# Supplementary material for: Options for mitigating global warming potential of a double-rice field in China
Source: Copernicus journal article supplement (doi:10.5194/acp-2016-227), 2016-04-14
Supplement: Supplementary file [file acp-2016-227-AC3-supplement.pdf]

1 **Drainage and tillage in winter fallow season mitigate global warming potential of**  
2 **a double-rice field in China**

3  
4 Guangbin Zhang<sup>1</sup>, Haiyang Yu<sup>1,2</sup>, Xianfang Fan<sup>1,2</sup>, Yuting Yang<sup>1,2</sup>, Jing Ma<sup>1</sup>, and Hua Xu<sup>1</sup>

5 <sup>1</sup>State Key Laboratory of Soil and Sustainable Agriculture, Institute of Soil Science, Chinese Academy  
6 of Sciences, Nanjing 210008, China

7 <sup>2</sup>University of Chinese Academy of Sciences, Beijing 100049, China

8 *Correspondence to:* Hua Xu (hxu@issas.ac.cn)

9  
10 **Abstract.** Traditional land managements (neither drainage nor tillage, NTND) in winter fallow season  
11 result in substantial CH<sub>4</sub> and N<sub>2</sub>O emissions from the double-rice fields in China. For investigating the  
12 effects of drainage and tillage in winter fallow season on global warming potentials (GWPs) of CH<sub>4</sub> and  
13 N<sub>2</sub>O emissions and developing mitigation options, a field experiment with four treatments: NTND,  
14 drainage but non-tillage (NTD), tillage but non-drainage (TND), and both drainage and tillage (TD) were  
15 carried out from 2010 to 2014 in a Chinese double-rice field. In winter fallow season total precipitation  
16 and mean daily temperature had important effects on CH<sub>4</sub> emission, and significant correlations were  
17 observed between them and CH<sub>4</sub> emission. Compared with NTND, drainage and tillage reduced CH<sub>4</sub>  
18 emission in early- and late-rice seasons and decreased annual emission by 54 and 33 kg CH<sub>4</sub> ha<sup>-1</sup> yr<sup>-1</sup>,  
19 respectively. Drainage and tillage increased N<sub>2</sub>O emission in winter fallow season while reduced it in  
20 early- and late-rice seasons, causing annual N<sub>2</sub>O emission unaffected. Accordingly, the GWPs were  
21 decreased by 1.49 and 0.92 t CO<sub>2</sub>-eq ha<sup>-1</sup> yr<sup>-1</sup>, respectively, and they were far more reduced by  
22 combining drainage with tillage, with a mitigation potential of 1.96 t CO<sub>2</sub>-eq ha<sup>-1</sup> yr<sup>-1</sup>. Low total C  
23 content and high C/N ratio in rice residues revealed that tillage in winter fallow season reduced CH<sub>4</sub> and  
24 N<sub>2</sub>O emissions in early- and late-rice seasons. Moreover, drainage and tillage significantly decreased the  
25 abundance of methanogens in paddy soil, which was a possible reason for the decrease of CH<sub>4</sub> emission.  
26 Greenhouse gas intensity was significantly decreased by drainage and tillage, and it was much more  
27 reduced by combining drainage with tillage, with a reduction of 0.17 t CO<sub>2</sub>-eq t<sup>-1</sup> yield. The results  
28 indicate that soil drainage combined with tillage in winter fallow season is an effective mitigating  
29 strategy in double-rice fields.

30

## 31 **1 Introduction**

32 Methane (CH<sub>4</sub>) and nitrous oxide (N<sub>2</sub>O) are two of the most important greenhouse gases (GHGs) after  
33 carbon dioxide (CO<sub>2</sub>) in the atmosphere. According to the Greenhouse Gas Bulletin of World  
34 Meteorological Organization, the concentrations of atmospheric CH<sub>4</sub> and N<sub>2</sub>O reached at 1833 and 327  
35 ppb in 2014, respectively (WMO, 2015). Paddy fields are considered to be the major sources of  
36 atmospheric CH<sub>4</sub> and N<sub>2</sub>O. Since the 2000s, effective options for mitigating CH<sub>4</sub> and N<sub>2</sub>O emissions  
37 from paddy fields have been continually explored over the world (McCarl and Schneider, 2001; Yan et  
38 al., 2005; Hussain et al., 2015), i.e. modifying irrigation and fertilization patterns (Cai et al., 2003;  
39 Hussain et al., 2015; Linqvist et al., 2015), setting integrated soil–crop system management practices  
40 (Zhang et al., 2013; Chen et al., 2014), and selection of suitable rice cultivar with high production but  
41 low GHGs emissions (Ma et al., 2010; Hussain et al., 2015; Su et al., 2015), etc. Nevertheless, potential  
42 mitigating methods might be still available due to the diversity of rice-based ecosystems and the  
43 difference in agronomic management practices (Weller et al., 2016).

44 China is one of the largest rice producers in the world, and its harvested area contributes 18.9% of the  
45 world total (FAOSTAT, 2014). In China, total CH<sub>4</sub> and N<sub>2</sub>O emissions from paddy fields were estimated  
46 to be 6.4 Tg yr<sup>-1</sup> and 180 Gg yr<sup>-1</sup>, respectively (Zhang et al., 2014). Double rice is the major  
47 rice-cropping system in China, accounting for over 40% of total rice cultivation area (Yearbook, 2014)  
48 and emitting ca. 50% of the total paddy CH<sub>4</sub> in China (Zhang et al., 2011; Chen et al., 2013). Double-rice  
49 fields mainly distribute at the south of the Yangtze River where usually has relative large precipitation  
50 and high temperature in winter fallow season. Traditionally, the fields are fallow in winter season with  
51 the soil neither drainage nor tillage after late-rice harvest, and they are usually subjected to visible  
52 floodwater after a heavy or a long-time raining. It is very likely to bring about CH<sub>4</sub> emission from these  
53 fields in winter fallow season and further to promote its emission during the following rice growth  
54 season. Modeling data had shown that CH<sub>4</sub> emission was significantly correlated with simulated soil  
55 moisture and mean precipitation of the preceding non-rice growth season (Kang et al., 2002). Incubation  
56 and pot experiments also affirmed that the higher the soil water contents in the non-rice growth season,  
57 the higher the CH<sub>4</sub> production rates and the more the CH<sub>4</sub> emissions in the subsequent rice season (Xu et  
58 al., 2003). An available mitigating option is hence proposed in this region, that is, the fields are drained  
59 to decrease the accumulation of rainwater in winter fallow season and finally to attenuate the positive  
60 effect of winter precipitation on CH<sub>4</sub> emission. However, drainage possibly stimulates N<sub>2</sub>O emission

61 from paddy field in winter fallow season because soil water content changes more quickly and  
62 intensively. It is well recognized that soil moisture regulates the processes of denitrification and  
63 nitrification and thus N<sub>2</sub>O emission (Bateman and Baggs, 2005; Lan et al., 2013). Since the overall  
64 balance between the net exchange of CH<sub>4</sub> and N<sub>2</sub>O emissions constitutes global warming potentials  
65 (GWPs) of rice ecosystem, the effect of soil drainage in winter fallow season on mitigating GWPs  
66 year-round from the double-rice field is not well understood.

67 Soil tillage is a conventional practice in rice cultivation, and considerable reports have shown that  
68 tilling the soil prior to rice transplanting plays a key role in CH<sub>4</sub> and N<sub>2</sub>O emissions (Hussain et al., 2015;  
69 Zhao et al., 2016). Meanwhile, tillage after rice harvest in winter fallow season probably has very  
70 important effects on CH<sub>4</sub> and N<sub>2</sub>O emissions. Firstly, it is beneficial for the rainwater to penetrate into  
71 the subsoil, which won't lead to the accumulation of rainwater in winter fallow season. It is then difficult  
72 to form the strict anaerobic environments in the top soil, which not only reduces CH<sub>4</sub> emission directly  
73 during the non-rice growing season, but also indirectly inhibits CH<sub>4</sub> emission during the following rice  
74 season. On the contrary, tillage makes rice residues fully contact with the soil and microorganism, which  
75 may accelerate the decomposition of organic matters and then in favor of CH<sub>4</sub> production and emission  
76 in the non-rice growth season (Pandey et al., 2012; Hussain et al., 2015). Secondly, it may also play a  
77 key role in CH<sub>4</sub> emission during the following rice season owing to the incompletely decomposed rice  
78 residues (Tang et al., 2016). In addition, tillage in winter fallow season whether increases N<sub>2</sub>O emission  
79 from the field or not is still not very clear. There are some contradictive lines of evidence asserting the  
80 promotion and reduction in N<sub>2</sub>O emissions from rice fields by soil tillage. For instance, tillage changes  
81 the soil properties (soil porosity and soil moisture, etc.) and then promotes N<sub>2</sub>O emission (Mutegi et al.,  
82 2010; Pandey et al., 2012) whereas incorporation of rice residues due to tillage may reduce N<sub>2</sub>O emission  
83 as a result of N immobilization (Huang et al., 2004; Ma et al., 2010). Based on a 3-year field  
84 measurement (Shang et al., 2011), the possible agricultural mitigating strategy that is crop residues  
85 incorporated into the soil accompanying with drainage in winter fallow season, has been proposed in a  
86 double-rice field. Nevertheless, the effects of drainage combined with tillage in winter fallow season on  
87 annual CH<sub>4</sub> and N<sub>2</sub>O emissions from double-rice fields, in particular on the corresponding mitigation  
88 potential are scarcely documented.

89 An *in situ* field measurement was conducted year-round for 4 years from 2010 to 2014 to study the  
90 CH<sub>4</sub> and N<sub>2</sub>O emissions from a typical double-rice field in China. The objectives of this study are (1) to

91 investigate the effects of soil drainage and tillage in winter fallow season on CH<sub>4</sub> and N<sub>2</sub>O emissions  
92 from the paddy field, (2) to estimate the mitigation potential of drainage and tillage, and thereby (3) to  
93 suggest the optimal land management strategies in winter fallow season for reducing GWPs of CH<sub>4</sub> and  
94 N<sub>2</sub>O emissions in the double rice-cropping systems in China.

95

## 96 **2 Methods and materials**

### 97 **2.1 Field site and experimental design**

98 The experimental field is located at Yujiang Town, Yingtan City, Jiangxi Province, China (28°15'N,  
99 116°55'E). The region has a typical subtropical monsoon climate with an annual mean temperature of  
100 about 18 °C and an annual precipitation of about 1800 mm. Prior to the experiment, the field was  
101 cultivated with early rice from April to July and late rice from July to November, and then kept in fallow  
102 for the rest of year. The soil type at the experimental field is classified as Typical Haplaquepts (Soil  
103 Survey Staff, 1975). The initial properties (0–15 cm) of the soil are pH (H<sub>2</sub>O) 4.74, organic carbon (SOC)  
104 17.0 g kg<sup>-1</sup>, and total N 1.66 g kg<sup>-1</sup>. Daily air temperature (°C) and rainfall (mm) throughout the whole  
105 observational period was provided by Red Soil Ecological Experiment Station, Chinese Academy of  
106 Sciences (Appendix S1).

107 Four treatments, laid out in a randomized block design in triplicate, were conducted in the  
108 experimental field after late-rice harvest from 2010 to 2014: (1) the plots were neither drainage nor  
109 tillage in the whole winter fallow season as Treatment NTND, which is the traditional land management  
110 in the local region; (2) the plots were drainage but non-tillage as Treatment NTD; (3) the plots were  
111 tillage but non-drainage as Treatment TND; (4) and the plots were drainage and tillage simultaneously as  
112 Treatment TD. Rice stubble in all treatments was around 25–35 cm long, about 3.0–4.0 t ha<sup>-1</sup> during the  
113 4 winter fallow seasons, respectively. Undergone the whole winter fallow season, a small portion of rice  
114 stubble was collected before early-rice transplanting in 2012 and 2013, and the total C and N contents  
115 were measured by the wet oxidation-redox titration method and the micro-Kjeldahl method, respectively  
116 (Lu, 2000). Soil water content in winter fallow season was determined gravimetrically after drying at  
117 105 °C for 8 h.

118 Local rice (*Oryza sativa* L.) cultivars, Zhongzao 33 and Nongxiang 98, were planted for the following  
119 early- and late-rice seasons, respectively. The seeds were sown in the seedling nursery and then  
120 transplanted into the experimental plots at their 3- to 4-leaf stage. Each season, nitrogen (N) and

121 potassium (K) fertilizations in form of urea and potassium chloride (KCl) were split into three  
122 applications, namely, basal fertilizers consisting of 90 kg N ha<sup>-1</sup> and 45 kg K ha<sup>-1</sup>, tillering fertilizers  
123 consisting of 54 kg N ha<sup>-1</sup> and 60 kg K ha<sup>-1</sup>, and panicle initiation fertilizers consisting of 36 kg N ha<sup>-1</sup>  
124 and 45 kg K ha<sup>-1</sup>. Phosphorus (P) fertilization in form of phosphorus pentoxide (P<sub>2</sub>O<sub>5</sub>) was applied to all  
125 the treatments as basal fertilizer at a rate of 75 kg P ha<sup>-1</sup>. After early-rice harvest, rice straw and stubble  
126 were all moved out of the plots, and more detailed descriptions about the water management and  
127 fertilization in early- and late-rice seasons are given in Appendix S2.

128

## 129 **2.2 CH<sub>4</sub> and N<sub>2</sub>O fluxes sampling and measurements**

130 Both CH<sub>4</sub> and N<sub>2</sub>O fluxes were measured once every 2–6 d and 7–10 d during the rice and non-rice  
131 seasons, respectively, using the static chamber technique (Zhang et al., 2011). The flux chamber was 0.5  
132 × 0.5 × 1 m, and plastic base (0.5 × 0.5 m) for the chamber was installed before the experiment. Four gas  
133 samples from each chamber were collected using 18-mL vacuum vials at 15-min intervals. Soil  
134 temperature and soil redox potential (Eh) at 0.1 m depth were simultaneously measured during gas  
135 collection. Rice grain yields were determined in each plot at early- and late-rice harvests.

136 The concentrations of CH<sub>4</sub> and N<sub>2</sub>O were analyzed with gas chromatographs equipped with a flame  
137 ionization detector (Shimadzu GC-12A, Shimadzu Co., Japan) and with an electron capture detector  
138 (Shimadzu GC-14B, Shimadzu Co., Japan), respectively. Both the emission fluxes were calculated from  
139 the linear increase of gas concentration at each sampling time (0, 15, 30 and 45 min during the time of  
140 chamber closure) and adjusted for area and volume of the chamber. Sample sets were rejected unless  
141 they yielded a linear regression value of  $r^2$  greater than 0.90. The amounts of CH<sub>4</sub> and N<sub>2</sub>O emissions  
142 were calculated by successive linear interpolation of average CH<sub>4</sub> and N<sub>2</sub>O emissions on the sampling  
143 days, assuming that CH<sub>4</sub> and N<sub>2</sub>O emissions followed a linear trend during the periods when no sample  
144 was taken.

145

## 146 **2.3 GWPs and GHGI estimates**

147 The 100-year GWPs (CH<sub>4</sub> and N<sub>2</sub>O) in different treatments were calculated by using IPCC factors  
148 (100-year GWPs (CH<sub>4</sub> + N<sub>2</sub>O) = 28 × CH<sub>4</sub> + 265 × N<sub>2</sub>O) (Myhre et al., 2013). The greenhouse gas  
149 intensity (GHGI) represented the GWPs per unit rice grain yield (Li et al., 2006): GHGI = GWPs/grain  
150 yield.

151

## 152 **2.4 Soil sampling and DNA extraction**

153 During the 2013–2014 winter fallow and early- and late-rice seasons, soil samples were collected in the  
154 beginning, middle and end of each season from the experimental plots for analyzing the abundances of  
155 methanogens and methanotrophs. Totally, there were 108 soil samples (3 seasons × 3 stages in each  
156 season × 4 treatments × 3 replicates). Each sample was collected at 0–5 cm depth in triplicate and fully  
157 mixed. Subsequently, all samples were stored at 4 °C for analyses of soil characteristics and subsamples  
158 were maintained at –80 °C for DNA extraction.

159 For each soil sample, genomic DNA was extracted from 0.5 g soil using a FastDNA spin kit for soil  
160 (MP Biomedicals LLC, Ohio, USA) according to the manufacturer's instructions. The extracted soil  
161 DNA was dissolved in 50 µl of elution buffer, checked by electrophoresis on 1% agarose, and then  
162 quantified using a spectrophotometer (NanoDrop Technologies, Wilmington, DE, USA) (Fan et al.,  
163 2016).

164

## 165 **2.5 Real-time PCR quantification of *mcrA* and *pmoA* genes**

166 The abundance of methanogenic *mcrA* gene copies and of methanotrophic *pmoA* genes copies was  
167 determined by quantitative PCR (qPCR) (Fan et al., 2016). Fragments of the *mcrA* and *pmoA* genes,  
168 encoding the methyl coenzyme-M reductase and the  $\alpha$  subunit of the particulate methane  
169 monooxygenase, respectively, were amplified using primers according to Hales et al. (1996) and  
170 Costello and Lidstrom (1999), respectively. Real-time quantitative PCR was performed on a CFX96  
171 Optical Real-Time Detection System (Bio-Rad Laboratories, Inc. Hercules, USA), and for the detailed  
172 descriptions please refer to our previous study (Fan et al., 2016).

173

## 174 **2.6 Statistical analyses**

175 Statistical analysis was performed using SPSS 18.0 software for Windows (SPSS Inc., USA).  
176 Differences in seasonal CH<sub>4</sub> and N<sub>2</sub>O emissions, 100-year GWPs (CH<sub>4</sub> and N<sub>2</sub>O), and grain yields  
177 among treatments were analyzed with a repeated-measures one-way analysis of variance (ANOVA) and  
178 least significant differences (LSD) test. The significance of the factors (land management and year) was  
179 examined by using a two-way analysis of variance (ANOVA). Statistically significant differences and  
180 correlations were set at  $P < 0.05$ .

181

## 182 **3 Results**

### 183 **3.1 CH<sub>4</sub> emission**

184 Obvious CH<sub>4</sub> fluxes were observed over the 4 winter fallow seasons, particularly during the 2011–2012  
185 winter fallow season though a small net sink of CH<sub>4</sub> to the atmosphere was measured occasionally (Fig.  
186 1). Total CH<sub>4</sub> emissions of the 4 treatments were highly lower ( $P < 0.05$ ) in the 2010–2011 winter fallow  
187 season ( $\sim 0.1\text{--}1$  kg CH<sub>4</sub> ha<sup>-1</sup>) than the following three winter fallow seasons ( $\sim 1\text{--}11$  kg CH<sub>4</sub> ha<sup>-1</sup>), and  
188 they were ranged from 1.73 to 4.91 kg CH<sub>4</sub> ha<sup>-1</sup> on average (Table 1). Seasonal CH<sub>4</sub> emissions varied  
189 significantly with year and field managements (Table 2,  $P < 0.01$ ). Tillage increased CH<sub>4</sub> emissions by  
190 43–69% relative to non-tillage over the 4 winter fallow seasons. In comparison of non-drainage,  
191 drainage reduced CH<sub>4</sub> emissions by 40–50%. Consequently, CH<sub>4</sub> emission was decreased by 14.8%  
192 relative to Treatment NTND with the integrated effects of soil drainage and tillage (Table 1).

193 During the 4 early- and late-rice seasons, the CH<sub>4</sub> fluxes of all treatments dramatically ascended under  
194 continuous flooding, and the highest CH<sub>4</sub> fluxes were observed on about 20–30 days after rice  
195 transplanting in early-rice seasons and about 10–30 days after rice transplanting in late-rice seasons (Fig.  
196 1). Subsequently, they sharply decreased after midseason aeration. An obvious flux peak was observed  
197 again approximately 1–2 weeks after re-flooding, particularly in the early-rice season. Apparently, the  
198 CH<sub>4</sub> emission always showed a higher flux peak in Treatment NTND than in Treatment TD.

199 Seasonal CH<sub>4</sub> emissions in early-rice season varied significantly with land managements, but it was  
200 not highly impacted by year or their interaction (Table 2). In contrast, total CH<sub>4</sub> emission did  
201 significantly vary with land managements and year in late-rice season (Table 2). In comparison of  
202 Treatment NTND, CH<sub>4</sub> emission was decreased by soil drainage and tillage, and on average, reduced by  
203 22.2% and 17.8% in early- and late-rice seasons, respectively (Table 1). Soil drainage combined with  
204 tillage further reduced CH<sub>4</sub> emission by 35.0% and 29.4% in early- and late-rice seasons, respectively.  
205 Compared with early-rice season (68.3–105.1 kg CH<sub>4</sub> ha<sup>-1</sup>), total CH<sub>4</sub> emission in late-rice season was  
206 8.0–17.9% greater.

207 Annually, total CH<sub>4</sub> emission was ranged from 151 to 222 kg CH<sub>4</sub> ha<sup>-1</sup>, averaged 46.1% and 52.1% of  
208 which came from the early- and late-rice seasons, respectively (Tables 1 and 3). Soil drainage and tillage  
209 played important roles in decreasing CH<sub>4</sub> emission. Relative to Treatment NTND, averaged CH<sub>4</sub>  
210 emission was decreased by 24.3% and 14.9% by drainage and tillage, separately, and it was highly

211 reduced by 32.0% when drainage was combined with tillage simultaneously (Table 3).

212

### 213 **3.2 N<sub>2</sub>O emission**

214 Substantial N<sub>2</sub>O emission was measured in the non-rice growth season though the fields were fallowed  
215 with no N-fertilization (Fig. 2 and Table 1). Total N<sub>2</sub>O emissions over the 4 winter fallow seasons varied  
216 significantly with land management and year while it did not significantly depended on their interaction  
217 (Table 2). Seasonal N<sub>2</sub>O emissions were relatively lower in the 2010–2012 winter fallow seasons than  
218 the following two winter fallow seasons. Compared with Treatment NTND, soil drainage and tillage  
219 generally increased N<sub>2</sub>O emissions, separately, and N<sub>2</sub>O emissions were significantly stimulated when  
220 combined drainage with tillage simultaneously. Over the 4 winter fallow seasons, seasonal N<sub>2</sub>O  
221 emissions averaged 36.4–68.2 g N<sub>2</sub>O–N ha<sup>-1</sup>, being 87.3%, 64.5% and 57.5% higher in Treatment TD  
222 than in Treatments NTND, TND, and NTD, respectively (Table 1).

223 After rice transplanting, pronounced N<sub>2</sub>O fluxes were observed with N-fertilization and midseason  
224 aeration, particularly in the period of dry/wet alternation (Fig. 2). Two-way ANOVA analyses indicated  
225 that seasonal N<sub>2</sub>O emissions during the early- and late-rice seasons were not highly influenced by land  
226 management, and the interactions of land management and year, except that N<sub>2</sub>O emissions depended  
227 significantly on year (Table 2). Compared with Treatments NTND and NTD, tillage increased N<sub>2</sub>O  
228 emission in 2011 early- and late-rice seasons whereas generally reduced N<sub>2</sub>O emission during the  
229 following rice seasons (Table 1).

230 Over the 4 early-rice seasons, drainage increased seasonal N<sub>2</sub>O emissions by 38.9–43.5% while tillage  
231 decreased by 10–12.9%, although no significant difference was observed (Table 1). In contrast, the  
232 effects of drainage and tillage seemed to be more important over the 4 late-rice seasons. For instance,  
233 drainage increased seasonal N<sub>2</sub>O emissions by 41.0–47.8% while tillage decreased by 10.3–14.4%.  
234 Annually, total N<sub>2</sub>O emission was ranged from 113 to 167 g N<sub>2</sub>O–N ha<sup>-1</sup>, averaged 34.4% of which  
235 derived from the winter fallow season (Tables 1 and 3). There was no significant difference in total N<sub>2</sub>O  
236 emission among the 4 treatments (Table 3).

237

### 238 **3.3 Global warming potential (GWP)**

239 Throughout the 4 winter fallow seasons, soil drainage and tillage had important effects on GWPs over  
240 the 100-year time, although it was, on average, very small, being from 0.07 to 0.16 t CO<sub>2</sub>-eq ha<sup>-1</sup> yr<sup>-1</sup>



241 (Table 1). Compared with Treatment NTND, drainage significantly decreased GWPs while tillage highly  
242 increased it. Consequently, soil drainage combined with tillage played a slightly role in GWPs relative to  
243 Treatment NTND.

244 In contrast, both soil drainage and tillage decreased GWPs in comparison of Treatment NTND over  
245 the 4 early-rice seasons, with 16.0–36.2% and 4.2–36.2% lower in Treatment NTD and Treatment TND,  
246 respectively (Table 1). The GWPs was hence far more decreased by drainage combined with tillage,  
247 being 26.6–42.4% lower in Treatment TD than in Treatment NTND. Totally, drainage significantly  
248 reduced GWPs by 27.4% for Treatment NTD, in particular on Treatment TD by 34.8% with the  
249 integrated effect of drainage and tillage relative to Treatment NTND. Meanwhile, tillage tended to  
250 decrease GWPs relative to Treatment NTND but this effect was not statistically significant.

251 Similar effects of soil drainage and tillage on GWPs were observed over the 4 late-rice seasons (Table  
252 1). Compared with Treatment NTND, GWPs was 7.5–35.4% and 11.7–20.4% lower in Treatments NTD  
253 and TND, respectively. Soil drainage combined with tillage significantly decreased GWPs by  
254 23.7–36.8% for Treatment TD in comparison of Treatment NTND. On average, drainage and tillage  
255 reduced GWPs by 20.6% and 15%, separately, and GWPs was significantly reduced (29.1%) by  
256 combining drainage with tillage simultaneously.

257 Annually, the GWPs averaged 4.29–6.25 t CO<sub>2</sub>-eq ha<sup>-1</sup>, with 46% and 52% of which derived from the  
258 early-rice and late-rice seasons, respectively (Tables 1 and 3). Compared with Treatment NTND, GWPs  
259 was significantly reduced by 0.92–1.49 t CO<sub>2</sub>-eq ha<sup>-1</sup> in Treatments TND and NTD, respectively, and it  
260 was decreased much more by 1.96 t CO<sub>2</sub>-eq ha<sup>-1</sup> in Treatment TD (Table 3).

261

### 262 **3.4 Rice grain yields**

263 Grain yields of Treatments TND and TD are generally higher than those of Treatments NTND and NTD  
264 over the 4 annual cycles (Table 1) though the yields slightly varied with land management and year as  
265 well as their interaction (Table 2). On average, the yields in Treatments TND and TD were over 6.5 t ha<sup>-1</sup>,  
266 4.8%–7.3% and 3.1%–4.4% higher than those of Treatments NTND and NTD during the early- and  
267 late-rice seasons, respectively. Annually, no significance in the total yields was observed among the  
268 treatments over the 4 years (Table 3). Throughout the 4 late-rice seasons, positive correlation was  
269 observed between grain yields of 4 treatments and the corresponding CH<sub>4</sub> emissions ( $r= 0.733$ ,  $P <$   
270  $0.01$ ).

271

### 272 **3.5 Greenhouse gas intensity (GHGI)**

273 Annual GHGI ranged from 0.32 to 0.49 t CO<sub>2</sub>-eq t<sup>-1</sup> yield, and it changed significantly among the  
274 treatments owing to GWPs highly controlled while annual rice yields slightly influenced by soil drainage  
275 and tillage (Table 3). Compared with Treatment NTND, drainage and tillage reduced GWPs by 23.8%  
276 and 14.7%, thus causing GHGI significantly decreased by 22.4% and 18.4%, separately. Expectedly, soil  
277 drainage combined with tillage reduced GHGI much more, with a reduction of 34.7% relative to  
278 Treatment NTND.

279

### 280 **3.6 Precipitation, temperature, soil Eh and soil water content in winter fallow season**

281 Over the 4 winter fallow seasons, total precipitation changed remarkably, which was ranged from ~400  
282 mm to ~750 mm during 2010–2012. Subsequently, it was relatively stable around 600 mm in 2012–2014  
283 (Table 4). In contrast, mean daily air temperature varied slightly, with values of ca. 9.0 °C to 10.0 °C.  
284 Soil Eh, on average, fluctuated obviously from the highest (~150 mV) in 2010–2011 to the lowest (~90  
285 mV) in 2013–2014. Soil water content in 2010 winter fallow season was generally higher in Treatment  
286 NTND than in Treatments NTD and TND, and it was lowest in Treatment TD (Fig. 3a), with a mean  
287 value of 55%, 50%, 44% and 38%, respectively. It is easy to see that the higher the precipitation and  
288 temperature, the lower the soil Eh, and thus the more the CH<sub>4</sub> emission in winter fallow season (Table 4).  
289 Statistical analyses show that a significant exponential relationship was observed between mean CH<sub>4</sub>  
290 emission and total precipitation (Fig. 3b,  $P < 0.01$ ), and mean CH<sub>4</sub> emission positively and negatively  
291 correlated with mean temperature (Fig. 3c,  $P < 0.05$ ) and soil Eh (Fig. 3d,  $P < 0.01$ ), respectively.

292

### 293 **3.7 Abundance of methanogens and methanotrophs populations**

294 The abundance of methanogens in paddy soil decreased significantly from winter fallow season to the  
295 following early-rice season, but it increased again during the late-rice season (Fig. 4a). Compared with  
296 non-drainage (Treatments NTND and TND), drainage (Treatments NTD and TD) generally decreased  
297 the abundance of methanogens throughout the winter fallow (Fig. 4a,  $P < 0.001$ ) and following early-  
298 and late-rice seasons (Fig. 4a,  $P < 0.05$ ). Relative to non-tillage (Treatments NTND and NTD), tillage  
299 (Treatments TND and TD) also significantly decreased the abundance of methanogens throughout the  
300 winter fallow and following early- and late-rice seasons (Fig. 4a,  $P < 0.001$ ).

301 The abundance of methanotrophs was highest in winter fallow season, and then it decreased gradually  
302 (Fig. 4b). Drainage (Treatments NTD and TD) relative to non-drainage (Treatments NTND and TND)  
303 significantly decreased the abundance of methanotrophs over the winter fallow and early-rice seasons  
304 (Fig. 4b,  $P < 0.05$ ) though no significance during the late-rice season. In addition, tillage (Treatments  
305 TND and TD) significantly decreased the abundance of methanogens during the previous winter (Fig. 4b,  
306  $P < 0.001$ ) and following early-rice seasons (Fig. 4b,  $P < 0.01$ ) in comparison of non-tillage (Treatments  
307 NTND and NTD), except in the late-rice season.

308

## 309 **4 Discussion**

### 310 **4.1 CH<sub>4</sub> emission from double-rice fields**

311 It is reported that *in situ* measurement of CH<sub>4</sub> emission in China was firstly carried out from 1987 to  
312 1989 in a double-rice field in Hangzhou City (Shangguan et al., 1993b). Subsequently, more and more  
313 CH<sub>4</sub> emissions from double-rice fields were observed (Cai et al., 2001; Shang et al., 2011). However,  
314 few investigations were referred to related measurements in the non-rice growth season. Fortunately,  
315 Shang et al. (2011) found the double-rice fields in Hunan province China usually acting as a small net  
316 sink of CH<sub>4</sub> emission (as low as  $-6 \text{ kg CH}_4 \text{ ha}^{-1}$ ) in winter fallow season. Although an occasionally  
317 negative CH<sub>4</sub> flux was also observed over the 4 winter fallow seasons (Fig. 1), the double-rice field in  
318 this study was an entire source of CH<sub>4</sub> emission, in particular during the 2011–2012 winter fallow season  
319 (Table 1). On average, around 2% of annual CH<sub>4</sub> emission emitted from the winter fallow season.

320 Because of the residues (mainly including roots and stubble) of early rice as well as high temperature  
321 resulting in substantial CH<sub>4</sub> production in paddy fields (Shangguan et al., 1993a; Yan et al., 2005), CH<sub>4</sub>  
322 emission of late-rice season was generally higher than that of early-rice season. More importantly, a very  
323 high CH<sub>4</sub> flux peak was usually observed in a couple of days after late-rice transplanting (Cai et al., 2001;  
324 Shang et al., 2011). In the present study, CH<sub>4</sub> emission in late-rice seasons was  $80.1\text{--}113.5 \text{ kg CH}_4 \text{ ha}^{-1}$ ,  
325 being 8.0–17.9% larger than that of early-rice seasons (Table 1) though total CH<sub>4</sub> emission in the last two  
326 early-rice seasons was found to be slight greater than those in late-rice seasons (Fig. 1). Mean annual  
327 CH<sub>4</sub> emission varied between  $151 \text{ and } 222 \text{ kg CH}_4 \text{ ha}^{-1}$  over the 4 years (Table 3), which was much  
328 lower than previous results (Cai et al., 2001; Shang et al., 2011). Great differences in these CH<sub>4</sub>  
329 measurements were probably attributed to different water and rice straw managements.

330 Significant differences in CH<sub>4</sub> emission from the fields in winter fallow and late-rice seasons were

331 observed (Table 2), indicating large changes in the interannual CH<sub>4</sub> emission. It is believed that the  
332 climatic variation may be the major factor leading to interannual variation of CH<sub>4</sub> emission at the  
333 macroscopic scale (Cai et al., 2009). In this study we found that total winter rainfall had an important  
334 effect on CH<sub>4</sub> emission, and the higher the rainfall, the greater the CH<sub>4</sub> emission throughout the 4 winter  
335 fallow seasons (Table 4). And an exponential relationship was observed between mean CH<sub>4</sub> emission and  
336 total rainfall in winter fallow season (Fig. 3b). The importance of rainfall in controlling CH<sub>4</sub> emission in  
337 winter fallow season, to some extent, also could be demonstrated by the negative relationships between  
338 mean soil Eh and CH<sub>4</sub> emission (Fig. 3d). According to different rice fields from 4 main rice growing  
339 regions in China, similar correlation was found between rainfall in winter fallow season and CH<sub>4</sub>  
340 emission in the rice growth season (Kang et al., 2002).

341 Nevertheless, we did not find any correlations between rainfall in winter fallow season and CH<sub>4</sub> flux  
342 in early- or late-rice season in this study, suggesting that rainfall in winter fallow season just significantly  
343 regulated CH<sub>4</sub> flux on-season, but didn't off-season. In contrast, a significant linear relationship was  
344 found ( $P < 0.01$ ) between CH<sub>4</sub> emissions and corresponding yields over the 4 late-rice seasons,  
345 demonstrating that crop growth benefited rice yield and biomass and thus stimulated CH<sub>4</sub> emission. It is  
346 reported that seasonal CH<sub>4</sub> emission depended greatly on rice biomass based on a long-term fertilizer  
347 experiment (Shang et al., 2011). Furthermore, changes in temperature over the 4 winter fallow seasons  
348 (Table 4) were supposed to play a key role in CH<sub>4</sub> emission, and the positive correlation had  
349 demonstrated this well (Fig. 3c). Many field measurements have shown the importance of temperature to  
350 CH<sub>4</sub> emission (Parashar et al., 1993; Cai et al., 2003; Zhang et al., 2011).

351

#### 352 **4.2 Effect of soil drainage in winter fallow season on CH<sub>4</sub> emission**

353 Considerable measurements of CH<sub>4</sub> emission as affected by soil drainage in winter fallow season have  
354 been reported from single-rice fields, and most of which were from the permanently flooded fields.  
355 Obviously, drainage significantly decreases CH<sub>4</sub> emission (Table 5). Draining the flooded fields inhibits  
356 CH<sub>4</sub> production and CH<sub>4</sub> emission in winter fallow season directly, and more importantly, it plays an  
357 important role in reducing CH<sub>4</sub> production and its emission in the subsequent rice-growing season  
358 (Zhang et al., 2011). Compared with non-drainage, drainage in this study significantly decreased CH<sub>4</sub>  
359 emission both in previous winter fallow seasons and following early- and late-rice seasons (Table 1), and  
360 over the 4 years, mean annual CH<sub>4</sub> emission was reduced by 38–54 kg CH<sub>4</sub> ha<sup>-1</sup> (Table 3). Such changes

361 were very likely due to the decrease of methanogens in paddy soils throughout the winter, early- and  
362 late-rice seasons by soil drainage (Fig. 4a) because drainage increases soil aeration and hence effectively  
363 reduces the survival rate and activity of methane-producing bacteria. According to microcosm  
364 experiments, Ma and Lu (2011) found that the total abundance of methanogenic archaeal populations  
365 decreased by 40% after multiple drainages, and quantitative PCR analysis further revealed that both *mcrA*  
366 gene copies and *mcrA* transcripts significantly decreased after dry/wet alternation (Ma et al., 2012).

367

#### 368 **4.3 Effect of soil tillage in winter fallow season on CH<sub>4</sub> emission**

369 Although CH<sub>4</sub> emission in winter fallow season was increased by soil tillage, it was highly decreased  
370 during the following early- and late-rice seasons (Table 1), and over the 4 years, on average, it was  
371 reduced by 17–33 kg CH<sub>4</sub> ha<sup>-1</sup> yr<sup>-1</sup> (Table 3). Compared to non-tillage, tillage may promote the  
372 decomposition of rice residues, and then stimulates CH<sub>4</sub> production and emission in winter fallow season.  
373 By contrast, as the readily decomposable part of the residues has largely been decomposed after a whole  
374 winter fallow season, the remaining hardly-decomposable part of organic matter doesn't have much  
375 effect on promoting CH<sub>4</sub> emission next year (Watanabe and Kimura, 1998). The content of total C in rice  
376 residues generally lower in Treatments TND and TD than in Treatments NTND and NTD (Table 6) has  
377 well demonstrated that tillage decreased the carbon substrates for methanogenesis. It therefore, relative  
378 to non-tillage, significantly reduced CH<sub>4</sub> emission (Table 3). In a rice-wheat rotation system, our 2-year  
379 field measurements also showed that the carbon content of rice straw incorporated into the soil in winter  
380 fallow season was decreased sharply in comparison of that applied to the field just prior to rice  
381 transplanting (Zhang et al., 2015). In addition, tillage highly reduced the abundance of methanogens  
382 throughout the winter fallow and early- and late-rice seasons (Fig. 4a) should be a probable reason for  
383 the decrease of CH<sub>4</sub> emission.

384

#### 385 **4.4 N<sub>2</sub>O emission from double-rice paddy fields**

386 Direct N<sub>2</sub>O emission from rice-based ecosystems mainly happens in the periods of midseason aeration  
387 and subsequent dry/wet alternation in rice-growing season, and in winter crop or fallow season (Cai et al.,  
388 1997; Yan et al., 2003; Zheng et al., 2004; Ma et al., 2013). It is estimated that most of croplands N<sub>2</sub>O  
389 emission comes from uplands and just 20–25% of which is from rice fields in China (Zhang et al., 2014).  
390 In China, field measurements of N<sub>2</sub>O emission began in 1992 from a single-rice field in Liaoning

391 province (Chen et al., 1995), and considerable observations from double-rice fields had been performed  
392 (Xu et al., 1997; Shang et al., 2011; Zhang et al., 2013). The total N<sub>2</sub>O emission of early- and late-rice  
393 seasons in this study, on average, varied between 70.6 and 114.7 g N<sub>2</sub>O-N ha<sup>-1</sup> yr<sup>-1</sup> over the 4 years  
394 (Table 1), being significantly lower than those reported by Shang et al. (2011) and Zhang et al. (2013)  
395 but similar to our previous measurements Ma et al. (2013). Furthermore, over 1/3 of annual N<sub>2</sub>O  
396 emission came from the winter fallow season (Table 1), indicating that N<sub>2</sub>O emission from paddy fields  
397 in winter fallow season was very important. Early field observations even showed that as high as  
398 60–90% of N<sub>2</sub>O emission occurred in winter fallow season (Shang et al., 2011). On a national scale, it is  
399 found that 41 Gg N<sub>2</sub>O-N yr<sup>-1</sup> emitted in the non-rice growth period, contributing 45% of the total N<sub>2</sub>O  
400 emission from rice-based ecosystems (Zheng et al., 2004). Although N<sub>2</sub>O emission from rice fields  
401 significantly affected by year (Table 2), reasons for the interannual variation were still not well known.  
402 In order to specify rules for interannual change in N<sub>2</sub>O emission, it is essential to maintain  
403 all-the-year-round long-term stationary field observations of N<sub>2</sub>O emission from the double-rice fields.

404

#### 405 **4.5 Effect of soil drainage in winter fallow season on N<sub>2</sub>O emission**

406 The production of soil N<sub>2</sub>O is mainly by the microbial processes of nitrification and denitrification while  
407 soil water content determines the general direction of the transformation of soil nitrogen. Soil drainage  
408 can cut down the soil water content and accelerate soil dry/wet alternation, thus promoting N<sub>2</sub>O emission  
409 from paddy fields (Davidson, 1992; Cai et al., 1997). It is because that soil dry/wet alternation stimulates  
410 the transformation of C and N in the soil, in particular on the microbial biomass C and N turnover  
411 (Potthoff et al., 2001). Expectedly, drainage usually decreased the soil water content in this study (Fig. 3a)  
412 and then increased N<sub>2</sub>O emission, on average, by 42% relative to non-drainage in winter fallow season  
413 (Table 1). Noted that drainage in previous winter fallow season also had an important effect on N<sub>2</sub>O  
414 emission from paddy fields during the following rice seasons, namely, it increased N<sub>2</sub>O emission both in  
415 early- and late-rice seasons (Table 1). It was possibly attributed to that drainage in winter fallow season  
416 would create soil moisture more beneficial to N<sub>2</sub>O production in the subsequent rice-growing seasons.  
417 Early report had well demonstrated that the production and emission of soil N<sub>2</sub>O was not only related to  
418 the soil moisture regime at the time, but also strongly affected by the previous soil moisture regime  
419 (Groffman and Tiedje, 1988). And regardless of how the water conditions were at that time, the previous  
420 soil moisture conditions affected the concentration of reductase or synthetic ability of the enzymes, thus

421 affecting denitrification (Dendooven and Anderson, 1995; Dendooven et al., 1996). Totally, annual N<sub>2</sub>O  
422 emission was increased by 37–48% compared drainage with non-drainage though there was no  
423 significant difference among the 4 treatments (Table 3).

424

#### 425 **4.6 Effect of soil tillage in winter fallow season on N<sub>2</sub>O emission**

426 Compared to non-tillage, tillage usually increased N<sub>2</sub>O emission in winter fallow season, on average, by  
427 39% over the 4 years (Table 1), which might be ascribed to two reasons. First, tillage increases soil  
428 aeration, which possibly promotes the process of nitrification. A soil column experiment has well  
429 demonstrated that moderate O<sub>2</sub> concentration is conducive to N<sub>2</sub>O production (Khdyer and Cho, 1983).  
430 Second, tillage accelerates rainwater from the plow layer percolating into the subsoil layer, stimulating  
431 the processes of soil dry/wet alternation and then promoting the transformation of N and production of  
432 N<sub>2</sub>O in the soil (Cai et al., 1997; Pottthoff et al., 2001). Tillage usually decreased soil water content (Fig.  
433 3a) could validate this to some extent. In contrast, it had negative effects on N<sub>2</sub>O emission during the  
434 following early- and late-rice seasons, and mean N<sub>2</sub>O emission over the 4 years was reduced by 12% and  
435 13%, respectively (Table 1). Compared to non-tillage, tillage decreased the content of total N in rice  
436 residues, which probably reduced the substrates for nitrification and denitrification. More importantly,  
437 the ratio of C/N in rice residues was increased by tillage (Table 6). Because the decomposition of rice  
438 residues with high C/N ratio probably resulted in more N immobilization in the soil and less N available  
439 to nitrification and denitrification for N<sub>2</sub>O production (Huang et al., 2004; Zou et al., 2005). As a whole,  
440 soil tillage played a slight role in annual N<sub>2</sub>O emission over the 4 years (Table 3).

441

#### 442 **4.7 Effect of soil drainage and tillage on GWPs and GHGI**

443 Although drainage increased N<sub>2</sub>O emission throughout the winter fallow, and early- and late-rice seasons,  
444 it significantly decreased CH<sub>4</sub> emission from paddy fields (Table 1). As a consequence, it highly reduced  
445 GWPs, with a decrease of 1.49 t CO<sub>2</sub>-eq ha<sup>-1</sup> annually (Table 3). Considerable studies have showed that  
446 drainage results in a trade-off between CH<sub>4</sub> and N<sub>2</sub>O emissions from rice fields (Table 5), and it is widely  
447 considered to be an effective mitigation option. Annually, the mitigation potential of GWPs from paddy  
448 fields by drainage in winter fallow season is over 50%. However, these measurements are mostly related  
449 to the single-rice fields with continuous flooding (Table 5), and few information are available about the  
450 effect on GWPs from double rice-cropping systems. In this study, we found that as high as 21–30% of

451 the GWPs reduced by drainage in winter fallow season throughout the previous winter fallow and  
452 following early- and late-rice seasons, and with 24% of mitigation potential annually (Table 3).

453 In contrast, tillage obviously increased both CH<sub>4</sub> and N<sub>2</sub>O emissions, thus highly increased GWPs in  
454 winter fallow season (Table 1). Indeed, in a single-rice field, Liang et al. (2007) found that it increased  
455 the GWPs of CH<sub>4</sub>, N<sub>2</sub>O and CO<sub>2</sub> emissions in winter fallow season (Table 5). Fortunately, it significantly  
456 decreased CH<sub>4</sub> and N<sub>2</sub>O emissions both in early- and late-rice seasons, and as a result, with a reduction of  
457 GWPs by 17% and 15%, respectively (Table 1). Annually, the GWPs were reduced by 0.92 t CO<sub>2</sub>-eq  
458 ha<sup>-1</sup>, with 15% of mitigation potential (Table 3). As expected, the integrated effects of soil drainage and  
459 tillage decreased GWPs much more, with a further reduction by 1.04 t CO<sub>2</sub>-eq ha<sup>-1</sup> yr<sup>-1</sup>. Moreover, the  
460 annual mitigation potential (as high as 32%) of soil drainage combined with tillage in this study was in  
461 the ranges of previous results reported by Zhang et al. (2012) and Zhang et al. (2015) in single-rice fields  
462 (Table 5). It is obvious that the soil drainage together with tillage simultaneously in winter fallow season  
463 might be an effective option for mitigating the GWPs of CH<sub>4</sub> and N<sub>2</sub>O emissions from the double  
464 rice-cropping systems.

465 More importantly, no significant difference in rice grain yields was observed among the 4 treatments  
466 over the 4 years (Tables 1 and 3). It suggests that we would not risk rice yield loss when we try to  
467 decrease the GWPs of CH<sub>4</sub> and N<sub>2</sub>O emissions by means of soil drainage or tillage in winter fallow  
468 season. So, soil drainage and tillage significantly decreased GHGI by 22.4% and 18.4%, separately, and  
469 the GHGI was decreased much more by combining drainage with tillage, with a reduction of 0.17 t  
470 CO<sub>2</sub>-eq t<sup>-1</sup> yield (Table 3). Based on a long-term fertilizer experiment, balanced fertilizer management,  
471 in particular on P fertilizer supplement, was suggested to be an available strategy in double rice-cropping  
472 systems (Shang et al., 2011). In this study, the effective mitigation option in double-rice fields we  
473 proposed is that soil drainage combined with tillage in winter fallow season.

474 In Conclusion, the study demonstrated that in winter fallow season large differences in CH<sub>4</sub> emissions  
475 were probably due to the changes in total precipitation and temperature. Soil drainage and tillage in  
476 winter fallow season separately, in particular on combining both of them, significantly decreased CH<sub>4</sub>  
477 emission and then GWPs of CH<sub>4</sub> and N<sub>2</sub>O emissions from double-rice field. One possible explanation for  
478 this phenomenon is that drainage and tillage decreased the abundance of methanogens in paddy soil.  
479 Moreover, low total C content in rice residues due to tillage was a potential reason for the decrease of  
480 CH<sub>4</sub> emission in the following early- and late-rice seasons. Finally, tillage reduced total N content but



481 increased C/N ratio in rice residues would be important to the decrease of N<sub>2</sub>O emission. For both  
482 achieving high rice grain yield and low GWPs in double-rice fields, land management strategies in this  
483 study we proposed, including the fields were drained immediately after late-rice harvest, and meanwhile,  
484 the fields were tilled with rice residues incorporated into the soil. The results would benefit the  
485 development of optimal management strategies in the double-rice systems and the interpretation of the  
486 corresponding mechanisms.

487

#### 488 **Acknowledgements**

489 This work was financially supported by the “Strategic Priority Research Program” of  
490 the Chinese Academy of Sciences (XDB15020103), the National Key Technology Research and  
491 Development Program (2013BAD11B02), the National Natural Sciences Foundation of China  
492 (41571232, 41271259), Foundation of the State Key Laboratory of Soil and Sustainable Agriculture  
493 (Y412010003), and the Knowledge Innovation Program of Institute of Soil Science, Chinese Academy  
494 of Sciences (ISSASIP1654). We sincerely thank Red Soil Ecological Experiment Station, Chinese  
495 Academy of Sciences for providing climate information. Deep appreciation also goes to the anonymous  
496 reviewers for their helpful comments.

497

#### 498 **Reference**

- 499 Bateman, E. J., and Baggs, E. M.: Contributions of nitrification and denitrification to N<sub>2</sub>O emissions  
500 from soils at different water-filled pore space, *Biol. Fertil. Soils*, 41, 379-388, 2005.
- 501 Bayer, C., Zschornack, T., Pedroso, G. M., Rosa, C. M. D., Camargo, E. S., Boeni, M., Elio Marcolin b,  
502 Reis, C. E. S. d., and Santos, D. C. d.: A seven-year study on the effects of fall soil tillage on yield-scaled  
503 greenhouse gas emission from flood irrigated rice in a humid subtropical climate, *Soil Till. Res.*, 145,  
504 118-125, 2015.
- 505 Cai, Z. C., Xing, G. X., Yan, X. Y., Xu, H., Tsuruta, H., Yagi, K., and Minami, K.: Methane and nitrous  
506 oxide emissions from rice paddy fields as affected by nitrogen fertilisers and water management, *Plant  
507 Soil*, 196, 7-14, 1997.
- 508 Cai, Z. C., Xu, H., Lu, W. S., Liao, Z. W., Wei, C. F., and Xie, D. T.: Influence of water management in  
509 winter crop season on CH<sub>4</sub> emission during the rice growing seasons, *Chinese Journal of Applied Ecology*,

510 9, 171-175 (In Chinese), 1998.

511 Cai, Z. C., Tsuruta, H., Rong, X. M., Xu, H., and Yuan, Z. P.: CH<sub>4</sub> emissions from rice paddies managed  
512 according to farmer's practice in Hunan, China, *Biogeochemistry*, 56, 75-91, 2001.

513 Cai, Z. C., Tsuruta, H., Gao, M., Xu, H., and Wei, C. F.: Options for mitigating methane emission from a  
514 permanently flooded rice field, *Glob. Change Biol.*, 9, 37-45, 2003.

515 Cai, Z. C., Xu, H., and Ma, J.: Methane and nitrous oxide emissions from rice-based ecosystems (In  
516 Chinese), Science and Technology University of China Press, Hefei, China, 2009.

517 Chen, G. X., Huang, G. H., Huang, B., Wu, J., Yu, K. W., Xu, H., Xue, X. H., and Wang, Z. P.: CH<sub>4</sub> and  
518 N<sub>2</sub>O emission from a rice field and effect of *Azolla* and fertilization on them, *Chinese Journal of Applied  
519 Ecology (In Chinese)*, 6, 378-382, 1995.

520 Chen, H., Zhu, Q. A., Peng, C. H., Wu, N., Wang, Y. F., Fang, X. Q., Jiang, H., Xiang, W. H., Chang, J.,  
521 Deng, X. W., and Yu, G. R.: Methane emissions from rice paddies natural wetlands, lakes in China:  
522 synthesis new estimate, *Glob. Change Biol.*, 19, 19-32, 2013.

523 Chen, X., Cui, Z., Fan, M., Vitousek, P., Zhao, M., Ma, W., Wang, Z., Zhang, W., Yan, X., Yang, J., Deng,  
524 X., Gao, Q., Zhang, Q., Guo, S., Ren, J., Li, S., Ye, Y., Huang, J., Tang, Q., Sun, Y., Peng, X., Zhang, J.,  
525 He, M., Zhu, Y., Xue, J., Wang, G., Wu, L., An, N., Ma, L., and Zhang, F.: Producing more grain with  
526 lower environmental costs, *Nature*, 514, 486-489, 2014.

527 Costello, A. M., and Lidstrom, M. E.: Molecular characterization of functional and phylogenetic genes  
528 from natural populations of methanotrophs in lake sediments, *Appl. Environ. Microb.*, 65, 5066-5074,  
529 1999.

530 Davidson, E. A.: Sources of nitric oxide and nitrous oxide following wetting of dry soil, *Soil Sci. Soc.  
531 Am. J.*, 56, 95-102, 1992.

532 Dendooven, L., and Anderson, J. M.: Maintenance of denitrification potential in pasture soil following  
533 anaerobic events, *Soil Biol. Biochem.*, 27, 1251-1260, 1995.

534 Dendooven, L., Duchateau, L., and Anderson, J. M.: Gaseous products of the denitrification process as  
535 affected by the antecedent water regime of the soil, *Soil Biol. Biochem.*, 28, 239-245, 1996.

536 Fan, X., Yu, H., Wu, Q., Ma, J., Xu, H., Yang, J., and Zhuang, Y.: Effects of fertilization on microbial  
537 abundance and emissions of greenhouse gases (CH<sub>4</sub> and N<sub>2</sub>O) in rice paddy fields, *Ecol Evol*, 6,  
538 1054-1063, 2016.

539 Food and Agriculture Organization of the United Nations Statistics Division (FAOSTAT):

540 <http://faostat3.fao.org/download/Q/QC/E>, 2014. (accessed on 19 July, 2016)

541 Groffman, P. M., and Tiedje, J. M.: Denitrification hysteresis during wetting and drying cycles in soil,  
542 *Soil Sci. Soc. Am. J.*, 52, 1626-1629, 1988.

543 Hales, B. A., Edwards, C., Ritchie, D. A., Hall, G., Pickup, R. W., and Saunders, J. R.: Isolation and  
544 identification of methanogen-specific DNA from blanket bog peat by PCR amplification and sequence  
545 analysis, *Appl. Environ. Microb.*, 62, 668-675, 1996.

546 Huang, Y., Zou, J. W., Zheng, X. H., Wang, Y. S., and Xu, X. K.: Nitrous oxide emissions as influenced  
547 by amendment of plant residues with different C : N ratios, *Soil Biol. Biochem.*, 36, 973-981, 2004.

548 Hussain, S., Peng, S. B., Fahad, S., Khaliq, A., Huang, J. L., Cui, K. H., and Nie, L. X.: Rice  
549 management interventions to mitigate greenhouse gas emissions: a review, *Environ. Sci. Pollut. R*, 22,  
550 3342-3360, 2015.

551 Jiang, C. S., Huang, Y. S., Zheng, X. H., Zhu, B., and Huang, Y.: Effects of tillage-cropping systems on  
552 methane and nitrous oxide emissions from permanently flooded rice fields in a central Sichuan hilly  
553 area of south west China, *Environmental Science*, 27, 207-213 (In Chinese), 2006.

554 Kang, G. D., Cai, Z. C., and Feng, Z. H.: Importance of water regime during the non-rice growing period  
555 in winter in regional variation of CH<sub>4</sub> emissions from rice fields during following rice growing period in  
556 China, *Nutr. Cycl. Agroecosys.*, 64, 95-100, 2002.

557 Khdyer, I. I., and Cho, C. M.: Nitrification and denitrification of nitrogen fertilizers in a soil column, *Soil*  
558 *Sci. Soc. Am. J.*, 47, 1134-1139, 1983.

559 Lan, T., Han, Y., Roelcke, M., Nieder, R., and Cai, Z. C.: Processes leading to N<sub>2</sub>O and NO emissions  
560 from two different Chinese soils under different soil moisture contents, *Plant Soil*, 371, 611-627, 2013.

561 Li, C. S., Salas, W., DeAngelo, B., and Rose, S.: Assessing alternatives for mitigating net greenhouse gas  
562 emissions and increasing yields from rice production in China over the next twenty years, *J. Environ.*  
563 *Qual.*, 35, 1554-1565, 2006.

564 Liang, W., Shi, Y., Zhang, H., Yue, J., and Huang, G. H.: Greenhouse gas emissions from northeast China  
565 rice fields in fallow season, *Pedosphere*, 17, 630-638, 2007.

566 Linquist, B. A., Anders, M. M., Adviento-Borbe, M. A. A., Chaney, R. L., Nalley, L. L., da Rosa, E. F. F.,  
567 and van Kessel, C.: Reducing greenhouse gas emissions, water use, and grain arsenic levels in rice  
568 systems, *Glob. Change Biol.*, 21, 407-417, 2015.

569 Lu, R.: Soil agro-chemical analyses (In Chinese), Agricultural Technical Press, Beijing, 2000.

570 Ma, E., Zhang, G., Ma, J., Xu, H., Cai, Z., and Yagi, K.: Effects of rice straw returning methods on N<sub>2</sub>O  
571 emission during wheat-growing season, *Nutr. Cycl. Agroecosys.*, 88, 463-469, 2010.

572 Ma, J., Ji, Y., Zhang, G. B., Xu, H., and Yagi, K.: Timing of midseason aeration to reduce CH<sub>4</sub> and N<sub>2</sub>O  
573 emissions from double rice cultivation in China, *Soil Sci. Plant Nutr.*, 59, 35-45, 2013.

574 Ma, K., Qiu, Q. F., and Lu, Y. H.: Microbial mechanism for rice variety control on methane emission  
575 from rice field soil, *Glob. Change Biol.*, 16, 3085-3095, 2010.

576 Ma, K., and Lu, Y. H.: Regulation of microbial methane production and oxidation by intermittent  
577 drainage in rice field soil, *FEMS Microbiol. Ecol.*, 75, 446-456, 2011.

578 Ma, K., Conrad, R., and Lu, Y.: Responses of Methanogen mcrA Genes and Their Transcripts to an  
579 Alternate Dry/Wet Cycle of Paddy Field Soil, *Appl. Environ. Microb.*, 78, 445-454, 2012.

580 McCarl, B. A., and Schneider, U. A.: Climate change-Greenhouse gas mitigation in US agriculture and  
581 forestry, *Science*, 294, 2481-2482, 2001.

582 Mutegi, J. K., Munkholm, L. J., Petersen, B. M., Hansen, E. M., and Petersen, S. O.: Nitrous oxide  
583 emissions and controls as influenced by tillage and crop residue management strategy, *Soil Biol.*  
584 *Biochem.*, 42, 1701-1711, 2010.

585 Myhre, G., D. Shindell, F. M. Br ón, W. Collins, J. Fuglestvedt, J. Huang, D. Koch, J. F. Lamarque, D.  
586 Lee, B. Mendoza, T. Nakajima, A. Robock, G. Stephens, and Zhang, T. T. a. H.: Anthropogenic and  
587 Natural Radiative Forcing. In: *Climate Change 2013: The Physical Science Basis, Contribution of*  
588 *Working Group I to the Fifth Assessment Report of the Intergovernmental Panel on Climate Change.*  
589 *Stocker, T.F., D. Qin, G.-K. Plattner, M. Tignor, S.K. Allen, J. Boschung, A. Nauels, Y. Xia, V. Bex and*  
590 *P.M. Midgley ed., edited by: Change, I. P. o. C., Cambridge University Press, Cambridge, United*  
591 *Kingdom and New York, NY, USA, 659-740 pp., 2013.*

592 Pandey, D., Agrawal, M., and Bohra, J. S.: Greenhouse gas emissions from rice crop with different  
593 tillage permutations in rice-wheat system, *Agr. Ecosyst. Environ.*, 159, 133-144, 2012.

594 Parashar, D. C., Gupta, P. K., Rai, J., Sharma, R. C., and Singh, N.: Effect of soil temperature on  
595 methane emission from paddy fields, *Chemosphere*, 26, 247-250, 1993.

596 Potthoff, M., Joergensen, R. G., and Wolters, V.: Short-term effects of earthworm activity and straw  
597 amendment on the microbial C and N turnover in a remoistened arable soil after summer drought, *Soil*  
598 *Biol. Biochem.*, 33, 583-591, 2001.

599 Shang, Q., Yang, X., Gao, C., Wu, P., Liu, J., Xu, Y., Shen, Q., Zou, J., and Guo, S.: Net annual global

600 warming potential and greenhouse gas intensity in Chinese double rice-cropping systems: a 3-year field  
601 measurement in long-term fertilizer experiments, *Glob. Change Biol.*, 17, 2196-2210, 2011.

602 Shangguan, X. J., Wang, M. X., Chen, D. Z., and Shen, R. X.: Methane production in rice paddy fields,  
603 *Advance in Earth Sciences (In Chinese)*, 8, 1-12, 1993a.

604 Shangguan, X. J., Wang, M. X., and Shen, R. X.: Regularity of methane emission from rice paddy fields,  
605 *Advance in Earth Sciences (In Chinese)*, 8, 23-36, 1993b.

606 Shiratori, Y., Watanabe, H., Furukawa, Y., Tsuruta, H., and Inubushi, K.: Effectiveness of a subsurface  
607 drainage system in poorly drained paddy fields on reduction of methane emissions, *Soil Sci. Plant Nutr.*,  
608 53, 387-400, 2007.

609 Soil Survey Staff: *Soil taxonomy: A Basic System of Soil Classification for Making and Interpreting Soil*  
610 *Surveys*, in, U.S. Government Printing Office, Handbook No. 436. Washington, DC, 1975.

611 Su, J., Hu, C., Yan, X., Jin, Y., Chen, Z., Guan, Q., Wang, Y., Zhong, D., Jansson, C., Wang, F., Schnurer,  
612 A., and Sun, C.: Expression of barley SUSIBA2 transcription factor yields high-starch low-methane rice,  
613 *Nature*, 523, 602-606, 2015.

614 Tang, S., Cheng, W., Hu, R., Guigue, J., Kimani, S. M., Tawaraya, K., and Xu, X.: Simulating the effects  
615 of soil temperature and moisture in the off-rice season on rice straw decomposition and subsequent CH<sub>4</sub>  
616 production during the growth season in a paddy soil, *Biol. Fertil. Soils*, 52, 739-748, 2016.

617 Watanabe, A., and Kimura, M.: Effect of rice straw application on CH<sub>4</sub> emission from paddy fields IV.  
618 Influence of rice straw incorporated during the previous cropping period, *Soil Sci. Plant Nutr.*, 44,  
619 507-512, 1998.

620 Weller, S., Janz, B., Jörg, L., Kraus, D., Racela, H. S. U., Wassmann, R., Butterbach-Bahl, K., and Kiese,  
621 R.: Greenhouse gas emissions and global warming potential of traditional and diversified tropical rice  
622 rotation systems, *Glob. Change Biol.*, 22, 432-448, 2016.

623 World Meteorological Organization (WMO): *The State of Greenhouse Gases in the Atmosphere Based*  
624 *on Global Observations through 2014*, *Greenhouse Gas Bulletin*, 1-4, 2015.

625 Xu, H., Guangxi, X., Cai, Z. C., and Tsuruta, H.: Nitrous oxide emissions from three rice paddy fields in  
626 China, *Nutr. Cycl. Agroecosys.*, 49, 23-28, 1997.

627 Xu, H., Cai, Z. C., and Tsuruta, H.: Soil moisture between rice-growing seasons affects methane  
628 emission, production, and oxidation, *Soil Sci. Soc. Am. J.*, 67, 1147-1157, 2003.

629 Yan, X. Y., Akimoto, H., and Ohara, T.: Estimation of nitrous oxide, nitric oxide and ammonia emissions

630 from croplands in East, Southeast and South Asia, *Glob. Change Biol.*, 9, 1080-1096, 2003.

631 Yan, X. Y., Yagi, K., Akiyama, H., and Akimoto, H.: Statistical analysis of the major variables  
632 controlling methane emission from rice fields, *Glob. Change Biol.*, 11, 1131-1141, 2005.

633 Yao, Z. S., Zheng, X. H., Wang, R., Xie, B. H., Butterbach-Bahl, K., and Zhu, J. G.: Nitrous oxide and  
634 methane fluxes from a rice-wheat crop rotation under wheat residue incorporation and no-tillage  
635 practices, *Atmos. Environ.*, 79, 641-649, 2013.

636 Yearbook, E. B. o. C. A.: China Agriculture Yearbook 2014 (In Chinese), China Agriculture Press,  
637 Beijing, 2014.

638 Zhang, G. B., Zhang, X. Y., Ma, J., Xu, H., and Cai, Z. C.: Effect of drainage in the fallow season on  
639 reduction of CH<sub>4</sub> production and emission from permanently flooded rice fields, *Nutr. Cycl. Agroecosys.*,  
640 89, 81-91, 2011.

641 Zhang, H. L., Bai, X. L., Xue, J. F., Chen, Z. D., Tang, H. M., and Chen, F.: Emissions of CH<sub>4</sub> and N<sub>2</sub>O  
642 under different tillage systems from double-cropped paddy fields in southern China, *Plos One*, 8, 2013.

643 Zhang, J. K., Jiang, C. S., Hao, Q. J., Tang, Q. W., Cheng, B. H., Li, H., and Chen, L. H.: Effects of  
644 tillage-cropping systems on methane and nitrous oxide emissions from agro-ecosystems in a purple paddy  
645 soil, *Environmental Science*, 33, 1979-1986 (In Chinese), 2012.

646 Zhang, W., Yu, Y. Q., Huang, Y., Li, T. T., and Wang, P.: Modeling methane emissions from irrigated rice  
647 cultivation in China from 1960 to 2050, *Glob. Change Biol.*, 17, 3511-3523, 2011.

648 Zhang, W., Yu, Y., Li, T., Sun, W., and Huang, Y.: Net greenhouse gas balance in China's croplands over  
649 the last three decades and its mitigation potential, *Environ. Sci. Technol.*, 48, 2589-2597, 2014.

650 Zhang, W. F., Dou, Z. X., He, P., Ju, X. T., Powlson, D., Chadwick, D., Norse, D., Lu, Y. L., Zhang, Y.,  
651 and Wu, L.: New technologies reduce greenhouse gas emissions from nitrogenous fertilizer in China,  
652 *Proceedings of the National Academy of Sciences*, 110, 8375-8380, 2013.

653 Zhang, Y. F., Sheng, J., Wang, Z. C., Chen, L. G., and Zheng, J. C.: Nitrous oxide and methane emissions  
654 from a Chinese wheat-rice cropping system under different tillage practices during the wheat-growing  
655 season, *Soil Till. Res.*, 146, 261-269, 2015.

656 Zhao, X., Liu, S. L., Pu, C., Zhang, X. Q., Xue, J. F., Zhang, R., Wang, Y. Q., Lal, R., Zhang, H. L., and  
657 Chen, F.: Methane and nitrous oxide emissions under no-till farming in China: a meta-analysis, *Glob.*  
658 *Change Biol.*, 22, 1372-1384, 2016.

659 Zheng, X. H., Han, S. H., Huang, Y., Wang, Y. S., and Wang, M. X.: Re-quantifying the emission factors

660 based on field measurements and estimating the direct N<sub>2</sub>O emission from Chinese croplands, Glob.  
661 Biogeochem. Cycle, 18, 2004.

662 Zou, J. W., Huang, Y., Jiang, J. Y., Zheng, X. H., and Sass, R. L.: A 3-year field measurement of methane  
663 and nitrous oxide emissions from rice paddies in China: Effects of water regime, crop residue, and  
664 fertilizer application, Glob. Biogeochem. Cycle, 19, 2005.

665

666

667

668

669

670

671

672

673

674

675

676

677

678

679

680

681

682

683

684

685

686

687

688

689

690

691

692

693 **Figure captions:**

694

695 **Figure 1** Seasonal variation of CH<sub>4</sub> emission from 2010 to 2014.

696

697

698 **Figure 2** Seasonal variation of N<sub>2</sub>O emission from 2010 to 2014.

699

700

701 **Figure 3** Soil water content in 2010 winter fallow season (a) and the relationships  
702 between mean CH<sub>4</sub> emission and total winter precipitation (b), and mean daily air  
703 temperature (c) and soil Eh (d) over the 4 winter fallow seasons (Data from Table 4).

704

705

706 **Figure 4** The abundance of methanogens and methanotrophs populations in paddy soil  
707 from 2013 to 2014, WS, ES, and LS means winter fallow season, early-rice season, and  
708 late-rice season, respectively.

709

710

711

712

713

714

715



716 **Table 1** Seasonal CH<sub>4</sub> and N<sub>2</sub>O emissions, global warming potentials (GWPs), and rice grain yields over the 4 years from 2010 to 2014.

| Year      | Treatment | Winter fallow season                                               |                                                                       |                                                   | Early-rice season                                                  |                                                                       |                                                   | Late-rice season            |                                                                    |                                                                       |                                                   |                             |
|-----------|-----------|--------------------------------------------------------------------|-----------------------------------------------------------------------|---------------------------------------------------|--------------------------------------------------------------------|-----------------------------------------------------------------------|---------------------------------------------------|-----------------------------|--------------------------------------------------------------------|-----------------------------------------------------------------------|---------------------------------------------------|-----------------------------|
|           |           | CH <sub>4</sub> emission<br>(kg CH <sub>4</sub> ha <sup>-1</sup> ) | N <sub>2</sub> O emission<br>(g N <sub>2</sub> O-N ha <sup>-1</sup> ) | GWPs<br>(t CO <sub>2</sub> -eq ha <sup>-1</sup> ) | CH <sub>4</sub> emission<br>(kg CH <sub>4</sub> ha <sup>-1</sup> ) | N <sub>2</sub> O emission<br>(g N <sub>2</sub> O-N ha <sup>-1</sup> ) | GWPs<br>(t CO <sub>2</sub> -eq ha <sup>-1</sup> ) | Yield (t ha <sup>-1</sup> ) | CH <sub>4</sub> emission<br>(kg CH <sub>4</sub> ha <sup>-1</sup> ) | N <sub>2</sub> O emission<br>(g N <sub>2</sub> O-N ha <sup>-1</sup> ) | GWPs<br>(t CO <sub>2</sub> -eq ha <sup>-1</sup> ) | Yield (t ha <sup>-1</sup> ) |
| 2010–2011 | TD        | 0.46 ± 0.02                                                        | 46.4 ± 1.5                                                            | 0.03 ± 0.01                                       | 61.3 ± 12.5                                                        | 49.0 ± 7.2                                                            | 1.74 ± 0.39                                       | 6.44 ± 0.82                 | 133.9 ± 18.6                                                       | 98.5 ± 4.3                                                            | 3.79 ± 0.17                                       | 7.13 ± 0.07                 |
|           | TND       | 1.05 ± 0.13                                                        | 30.4 ± 3.1                                                            | 0.04 ± 0.02                                       | 80.6 ± 2.4                                                         | 46.6 ± 7.1                                                            | 2.28 ± 0.06                                       | 6.29 ± 0.20                 | 158.5 ± 28.3                                                       | 67.4 ± 2.1                                                            | 4.46 ± 0.40                                       | 7.33 ± 0.09                 |
|           | NTD       | 0.11 ± 0.19                                                        | 42.7 ± 5.3                                                            | 0.02 ± 0.02                                       | 70.6 ± 6.1                                                         | 45.3 ± 11.1                                                           | 2.00 ± 0.16                                       | 6.08 ± 0.60                 | 147.0 ± 15.6                                                       | 62.8 ± 5.1                                                            | 4.14 ± 0.02                                       | 6.72 ± 0.22                 |
|           | NTND      | 0.38 ± 0.07                                                        | 32.2 ± 5.1                                                            | 0.02 ± 0.01                                       | 84.9 ± 14.3                                                        | 38.9 ± 12.3                                                           | 2.38 ± 0.29                                       | 5.82 ± 0.34                 | 179.6 ± 26.2                                                       | 44.5 ± 11.0                                                           | 5.05 ± 0.15                                       | 6.83 ± 0.84                 |
| 2011–2012 | TD        | 5.06 ± 1.18                                                        | 42.0 ± 1.8                                                            | 0.16 ± 0.04                                       | 64.0 ± 12.5                                                        | 17.7 ± 7.9                                                            | 1.80 ± 0.35                                       | 6.67 ± 0.08                 | 79.6 ± 8.8                                                         | 45.2 ± 7.8                                                            | 2.25 ± 0.24                                       | 6.63 ± 0.09                 |
|           | TND       | 11.1 ± 2.51                                                        | 35.1 ± 2.7                                                            | 0.33 ± 0.07                                       | 90.6 ± 8.2                                                         | 16.2 ± 7.2                                                            | 2.54 ± 0.23                                       | 7.03 ± 0.50                 | 103.1 ± 6.0                                                        | 35.4 ± 8.0                                                            | 2.90 ± 0.16                                       | 6.70 ± 0.21                 |
|           | NTD       | 4.54 ± 0.32                                                        | 27.3 ± 11.3                                                           | 0.14 ± 0.04                                       | 68.1 ± 11.8                                                        | 28.2 ± 6.1                                                            | 1.92 ± 0.22                                       | 6.36 ± 0.36                 | 81.0 ± 4.3                                                         | 63.0 ± 9.6                                                            | 2.30 ± 0.80                                       | 6.57 ± 0.35                 |
|           | NTND      | 7.09 ± 1.08                                                        | 14.1 ± 4.4                                                            | 0.20 ± 0.05                                       | 107.1 ± 9.9                                                        | 23.4 ± 4.8                                                            | 3.01 ± 0.27                                       | 6.67 ± 0.47                 | 126.4 ± 12.2                                                       | 47.2 ± 11.0                                                           | 3.56 ± 0.66                                       | 6.53 ± 0.14                 |
| 2012–2013 | TD        | 1.40 ± 0.21                                                        | 88.2 ± 14.7                                                           | 0.08 ± 0.02                                       | 79.7 ± 15.2                                                        | 27.5 ± 4.1                                                            | 2.24 ± 0.49                                       | 6.33 ± 0.50                 | 44.3 ± 2.1                                                         | 32.3 ± 3.7                                                            | 1.25 ± 0.07                                       | 6.46 ± 0.41                 |
|           | TND       | 3.75 ± 0.21                                                        | 59.7 ± 18.0                                                           | 0.13 ± 0.02                                       | 101.1 ± 14.8                                                       | 17.7 ± 15.0                                                           | 2.84 ± 0.42                                       | 6.48 ± 0.78                 | 52.7 ± 11.1                                                        | 15.3 ± 3.5                                                            | 1.48 ± 0.31                                       | 6.30 ± 0.23                 |
|           | NTD       | 0.73 ± 0.22                                                        | 52.0 ± 9.1                                                            | 0.04 ± 0.01                                       | 80.6 ± 9.6                                                         | 36.4 ± 13.1                                                           | 2.27 ± 0.27                                       | 6.05 ± 0.47                 | 60.8 ± 11.8                                                        | 38.1 ± 2.4                                                            | 1.72 ± 0.34                                       | 6.27 ± 0.50                 |
|           | NTND      | 2.11 ± 0.23                                                        | 56.5 ± 13.0                                                           | 0.08 ± 0.00                                       | 108.7 ± 5.8                                                        | 24.1 ± 14.9                                                           | 3.05 ± 0.15                                       | 6.38 ± 0.73                 | 65.9 ± 12.9                                                        | 32.3 ± 6.7                                                            | 1.86 ± 0.36                                       | 6.08 ± 0.24                 |
| 2013–2014 | TD        | 2.94 ± 0.78                                                        | 96.1 ± 22.9                                                           | 0.12 ± 0.04                                       | 68.1 ± 7.0                                                         | 76.0 ± 15.1                                                           | 1.94 ± 0.29                                       | 7.07 ± 0.34                 | 62.6 ± 4.7                                                         | 49.5 ± 2.8                                                            | 1.77 ± 0.14                                       | 6.64 ± 0.31                 |
|           | TND       | 3.73 ± 0.85                                                        | 44.7 ± 26.0                                                           | 0.12 ± 0.08                                       | 76.2 ± 5.0                                                         | 42.1 ± 8.0                                                            | 2.15 ± 0.11                                       | 6.43 ± 0.60                 | 72.1 ± 9.2                                                         | 42.1 ± 12.9                                                           | 2.04 ± 0.25                                       | 6.38 ± 0.47                 |
|           | NTD       | 1.52 ± 0.48                                                        | 52.0 ± 28.4                                                           | 0.06 ± 0.02                                       | 88.4 ± 6.3                                                         | 85.4 ± 10.9                                                           | 2.51 ± 0.21                                       | 6.19 ± 0.23                 | 70.6 ± 13.6                                                        | 99.7 ± 7.5                                                            | 2.02 ± 0.39                                       | 6.46 ± 0.61                 |
|           | NTND      | 2.01 ± 0.09                                                        | 42.9 ± 10.6                                                           | 0.07 ± 0.04                                       | 119.7 ± 10.8                                                       | 49.4 ± 13.6                                                           | 3.37 ± 0.33                                       | 6.16 ± 0.36                 | 82.2 ± 3.1                                                         | 54.4 ± 9.5                                                            | 2.32 ± 0.08                                       | 6.16 ± 0.12                 |
| Mean*     | TD        | 2.47 ± 0.10 bc                                                     | 68.2 ± 16.4 a                                                         | 0.10 ± 0.02 b                                     | 68.3 ± 11.4 b                                                      | 42.5 ± 11.2 a                                                         | 1.93 ± 0.32 b                                     | 6.62 ± 0.25 a               | 80.1 ± 2.7 c                                                       | 56.4 ± 17.4 ab                                                        | 2.27 ± 0.08 c                                     | 6.71 ± 0.14 a               |
|           | TND       | 4.91 ± 0.43 a                                                      | 42.5 ± 12.3 ab                                                        | 0.16 ± 0.02 a                                     | 87.2 ± 13 ab                                                       | 30.6 ± 15.0 a                                                         | 2.45 ± 0.37 ab                                    | 6.56 ± 0.49 a               | 96.6 ± 8.3 b                                                       | 40.0 ± 4.3 b                                                          | 2.72 ± 0.23 b                                     | 6.68 ± 0.24 a               |
|           | NTD       | 1.73 ± 0.37 c                                                      | 43.5 ± 18.4 ab                                                        | 0.07 ± 0.00 c                                     | 76.2 ± 6.9 b                                                       | 48.8 ± 18.1 a                                                         | 2.15 ± 0.19 b                                     | 6.17 ± 0.27 a               | 89.9 ± 1.2 bc                                                      | 65.9 ± 6.6 a                                                          | 2.54 ± 0.03 bc                                    | 6.51 ± 0.39 a               |
|           | NTND      | 2.90 ± 0.21 b                                                      | 36.4 ± 13.5 b                                                         | 0.10 ± 0.02 b                                     | 105.1 ± 15.5 a                                                     | 34.0 ± 6.9 a                                                          | 2.96 ± 0.44 a                                     | 6.26 ± 0.33 a               | 113.5 ± 8.0 a                                                      | 44.6 ± 8.0 b                                                          | 3.20 ± 0.22 a                                     | 6.40 ± 0.20 a               |

717 Mean\* ±SD, different letters within the same column indicate statistical differences in variables mean among treatments over the 4 years by LSD's multiple range test ( $P < 0.05$ ).

718  
719  
720  
721  
722  
723  
724  
725  
726  
727  
728  
729  
730  
731  
732  
733  
734  
735  
736  
737  
738  
739

**Table 2** A two-way ANOVA for the effects of land management (L) and year (Y) on CH<sub>4</sub> and N<sub>2</sub>O emissions and grain yields in the rice field.

| Season     | Factors | df | CH <sub>4</sub> (kg CH <sub>4</sub> ha <sup>-1</sup> ) |        |       | N <sub>2</sub> O (g N <sub>2</sub> O-N ha <sup>-1</sup> ) |       |       | Yield (t ha <sup>-1</sup> ) |       |       |
|------------|---------|----|--------------------------------------------------------|--------|-------|-----------------------------------------------------------|-------|-------|-----------------------------|-------|-------|
|            |         |    | ss                                                     | F      | P     | ss                                                        | F     | P     | ss                          | F     | P     |
| Early-rice | L       | 3  | 3052.7                                                 | 5.196  | 0.005 | 820.1                                                     | 1.007 | 0.403 | 0.603                       | 2.361 | 0.090 |
|            | Y       | 3  | 692.3                                                  | 1.178  | 0.333 | 4357.4                                                    | 5.349 | 0.004 | 0.598                       | 3.340 | 0.092 |
|            | L × Y   | 9  | 254.2                                                  | 0.433  | 0.907 | 267.0                                                     | 0.328 | 0.959 | 0.161                       | 0.631 | 0.762 |
|            | Model   | 15 | 901.5                                                  | 1.535  | 0.151 | 1195.7                                                    | 1.468 | 0.176 | 0.337                       | 1.319 | 0.248 |
|            | Error   | 32 | 587.5                                                  |        |       | 814.7                                                     |       |       | 0.256                       |       |       |
| Late-rice  | L       | 3  | 2379.4                                                 | 4.700  | 0.008 | 1635.2                                                    | 1.528 | 0.226 | 0.259                       | 1.522 | 0.228 |
|            | Y       | 3  | 22545.7                                                | 44.534 | 0.000 | 3515.8                                                    | 3.286 | 0.033 | 1.193                       | 7.015 | 0.001 |
|            | L × Y   | 9  | 223.0                                                  | 0.440  | 0.903 | 826.9                                                     | 0.806 | 0.614 | 0.057                       | 0.338 | 0.955 |
|            | Model   | 15 | 5118.8                                                 | 10.111 | 0.000 | 1547.9                                                    | 1.447 | 0.185 | 0.325                       | 1.910 | 0.061 |
|            | Error   | 32 | 506.3                                                  |        |       | 1070.0                                                    |       |       | 0.170                       |       |       |
| Winter     | L       | 3  | 21.582                                                 | 5.215  | 0.005 | 2367.6                                                    | 4.537 | 0.009 |                             |       |       |
|            | Y       | 3  | 86.036                                                 | 20.788 | 0.000 | 3265.9                                                    | 6.259 | 0.002 |                             |       |       |
|            | L × Y   | 9  | 4.020                                                  | 0.971  | 0.481 | 314.4                                                     | 0.603 | 0.785 |                             |       |       |
|            | Model   | 15 | 23.935                                                 | 5.783  | 0.000 | 1315.4                                                    | 2.521 | 0.014 |                             |       |       |
|            | Error   | 32 | 4.139                                                  |        |       | 521.8                                                     |       |       |                             |       |       |

740  
741  
742  
743  
744  
745  
746  
747  
748  
749  
750  
751  
752  
753  
754  
755  
756  
757  
758  
759  
760  
761  
762  
763  
764  
765  
766  
767  
768  
769  
770  
771  
772

**Table 3** Mean annual CH<sub>4</sub> and N<sub>2</sub>O emissions, global warming potentials (GWPs) of CH<sub>4</sub> and N<sub>2</sub>O emissions, rice grain yields, and greenhouse gas intensity (GHGI) over the 4 years from 2010 to 2014.

| Treatment | CH <sub>4</sub> emission<br>(kg CH <sub>4</sub> ha <sup>-1</sup> yr <sup>-1</sup> ) | N <sub>2</sub> O emission<br>(g N <sub>2</sub> O-N ha <sup>-1</sup> yr <sup>-1</sup> ) | GWPs<br>(t CO <sub>2</sub> -eq ha <sup>-1</sup> yr <sup>-1</sup> ) | Rice yields<br>(t ha <sup>-1</sup> yr <sup>-1</sup> ) | GHGI<br>(t CO <sub>2</sub> -eq t <sup>-1</sup> yield) |
|-----------|-------------------------------------------------------------------------------------|----------------------------------------------------------------------------------------|--------------------------------------------------------------------|-------------------------------------------------------|-------------------------------------------------------|
| TD        | 151 ± 10 d                                                                          | 167 ± 28 a                                                                             | 4.29 ± 0.27 d                                                      | 13.3 ± 0.3 a                                          | 0.32 ± 0.02 c                                         |
| TND       | 189 ± 15 b                                                                          | 113 ± 13 a                                                                             | 5.33 ± 0.41 b                                                      | 13.2 ± 0.6 a                                          | 0.40 ± 0.05 b                                         |
| NTD       | 168 ± 6 cd                                                                          | 158 ± 27 a                                                                             | 4.76 ± 0.17 cd                                                     | 12.7 ± 0.6 a                                          | 0.38 ± 0.02 b                                         |
| NTND      | 222 ± 9 a                                                                           | 115 ± 38 a                                                                             | 6.25 ± 0.26 a                                                      | 12.7 ± 0.1 a                                          | 0.49 ± 0.02 a                                         |

Note: different letters within the same column indicate statistical differences among treatments at  $P < 0.05$  level by LSD's test.

773  
774  
775  
776  
777  
778  
779  
780  
781  
782  
783  
784  
785  
786  
787  
788  
789  
790  
791  
792  
793  
794  
795  
796  
797  
798  
799  
800  
801  
802  
803  
804  
805

**Table 4** Total precipitation, mean daily temperature, <sup>a</sup> mean soil Eh, CH<sub>4</sub>, and N<sub>2</sub>O fluxes over the 4 winter fallow seasons.

| Winter fallow season                      | Precipitation (mm) | Temperature (°C) | Soil Eh (mV) | CH <sub>4</sub> flux (mg CH <sub>4</sub> m <sup>-2</sup> h <sup>-1</sup> ) | N <sub>2</sub> O flux (µg N <sub>2</sub> O-N m <sup>-2</sup> h <sup>-1</sup> ) |
|-------------------------------------------|--------------------|------------------|--------------|----------------------------------------------------------------------------|--------------------------------------------------------------------------------|
| 2010 (December 2, 2010 to April 15, 2011) | 404                | 9.1              | 152 ± 11     | 0.02 ± 0.01                                                                | 5.01 ± 0.26                                                                    |
| 2011 (November 3, 2011 to April 19, 2012) | 754                | 10.0             | 102 ± 13     | 0.18 ± 0.08                                                                | 3.11 ± 0.31                                                                    |
| 2012 (December 5, 2012 to April 15, 2013) | 574                | 9.7              | 141 ± 34     | 0.07 ± 0.04                                                                | 8.41 ± 0.54                                                                    |
| 2013 (November 11, 2013 to April 5, 2014) | 661                | 9.4              | 92 ± 12      | 0.08 ± 0.03                                                                | 7.06 ± 0.38                                                                    |

Note: <sup>a</sup> mean soil Eh, CH<sub>4</sub>, and N<sub>2</sub>O fluxes were the average of 4 treatments, respectively.

806  
807  
808  
809  
810  
811  
812  
813  
814  
815  
816  
817  
818  
819  
820  
821  
822  
823  
824  
825  
826  
827  
828

**Table 5** Relative mitigating GWPs of GHGs emissions from paddy fields with various land management practices as compared to traditional managements in winter crop season.

| Type        | Traditional management                      | Suggested practice                      | GHGs                                                    | <sup>a</sup> Mitigation potential (%) |      |    |        | Reference                |
|-------------|---------------------------------------------|-----------------------------------------|---------------------------------------------------------|---------------------------------------|------|----|--------|--------------------------|
|             |                                             |                                         |                                                         | WS                                    | ES   | LS | Annual |                          |
| Double rice | Winter fallow without drainage nor tillage  | Drainage                                | CH <sub>4</sub> and N <sub>2</sub> O                    | 30                                    | 27   | 21 | 24     | This study               |
|             |                                             | Tillage                                 | CH <sub>4</sub> and N <sub>2</sub> O                    | -60                                   | 17   | 15 | 15     |                          |
|             |                                             | Drainage combined with tillage          | CH <sub>4</sub> and N <sub>2</sub> O                    | 0                                     | 35   | 29 | 32     |                          |
| Single rice | Winter wheat with drainage                  | Tillage                                 | CH <sub>4</sub> and N <sub>2</sub> O                    | 21                                    | 14   |    | 15     | (Zhang et al., 2015)     |
| Single rice | Winter ryegrass with drainage               | Tillage                                 | N <sub>2</sub> O                                        | <sup>b</sup> N.m.                     | 22   |    | N.m.   | (Bayer et al., 2015)     |
| Single rice | Winter wheat with drainage                  | Tillage                                 | CH <sub>4</sub> and N <sub>2</sub> O                    | 38                                    | N.m. |    | N.m.   | (Yao et al., 2013)       |
| Single rice | Winter fallow and continuous flooding       | Oil-seed rape with drainage and tillage | CH <sub>4</sub> and N <sub>2</sub> O                    | 4                                     | 57   |    | 43     | (Zhang et al., 2012)     |
| Single rice | Winter fallow without drainage nor tillage  | Drainage                                | CH <sub>4</sub>                                         | N.m.                                  | 71   |    | >71    | (Shiratori et al., 2007) |
| Single rice | Winter fallow with drainage but non-tillage | tillage                                 | CH <sub>4</sub> , N <sub>2</sub> O, and CO <sub>2</sub> | -21                                   | N.m. |    | N.m.   | (Liang et al., 2007)     |
| Single rice | Winter fallow and continuous flooding       | Wheat with drainage                     | CH <sub>4</sub> and N <sub>2</sub> O                    | 59                                    | 55   |    | 56     | (Jiang et al., 2006)     |
| Single rice | Winter fallow and continuous flooding       | Oil-seed rape with drainage             | CH <sub>4</sub> and N <sub>2</sub> O                    | 53                                    | 57   |    | 56     |                          |
| Single rice | Winter fallow and continuous flooding       | Wheat with drainage                     | CH <sub>4</sub>                                         | 100                                   | 30   |    | 59     | (Cai et al., 2003)       |
| Single rice | Winter fallow and continuous flooding       | Wheat with drainage                     | CH <sub>4</sub>                                         | N.m.                                  | 68   |    | >68    | (Cai et al., 1998)       |

Note: WS, ES, and LS means winter fallow season, early-rice season and late-rice season, respectively; annual is the total of winter and rice seasons; <sup>a</sup> Mitigation potential of combined gases was calculated on the basis of CO<sub>2</sub> equivalents by assuming GWPs for CH<sub>4</sub> and N<sub>2</sub>O as 28 and 265 times the equivalent mass of CO<sub>2</sub> over a 100-year period (Myhre et al., 2013): GWPs (CH<sub>4</sub> + N<sub>2</sub>O + CO<sub>2</sub>) = (CH<sub>4</sub> × 28) + (N<sub>2</sub>O × 265) + (CO<sub>2</sub> × 1); <sup>b</sup> N.m. indicates no measurements.

829  
830  
831  
832  
833  
834  
835  
836  
837  
838  
839  
840  
841  
842  
843  
844  
845  
846  
847  
848  
849  
850  
851  
852  
853  
854  
855  
856

**Table 6** Measurements of total C ( $\text{g kg}^{-1}$ ) and total N ( $\text{g kg}^{-1}$ ) contents in rice stubble before early-rice transplanting in 2012 and 2013.

| Year | Treatment | Total C | Total N | C/N |
|------|-----------|---------|---------|-----|
| 2012 | TD        | 338     | 6.9     | 49  |
|      | TND       | 314     | 7.8     | 40  |
|      | NTD       | 356     | 12.7    | 28  |
|      | NTND      | 374     | 10.4    | 36  |
| 2013 | TD        | 368     | 8.7     | 42  |
|      | TND       | 364     | 7.1     | 51  |
|      | NTD       | 404     | 12.8    | 32  |
|      | NTND      | 397     | 13.4    | 30  |

857  
858  
859

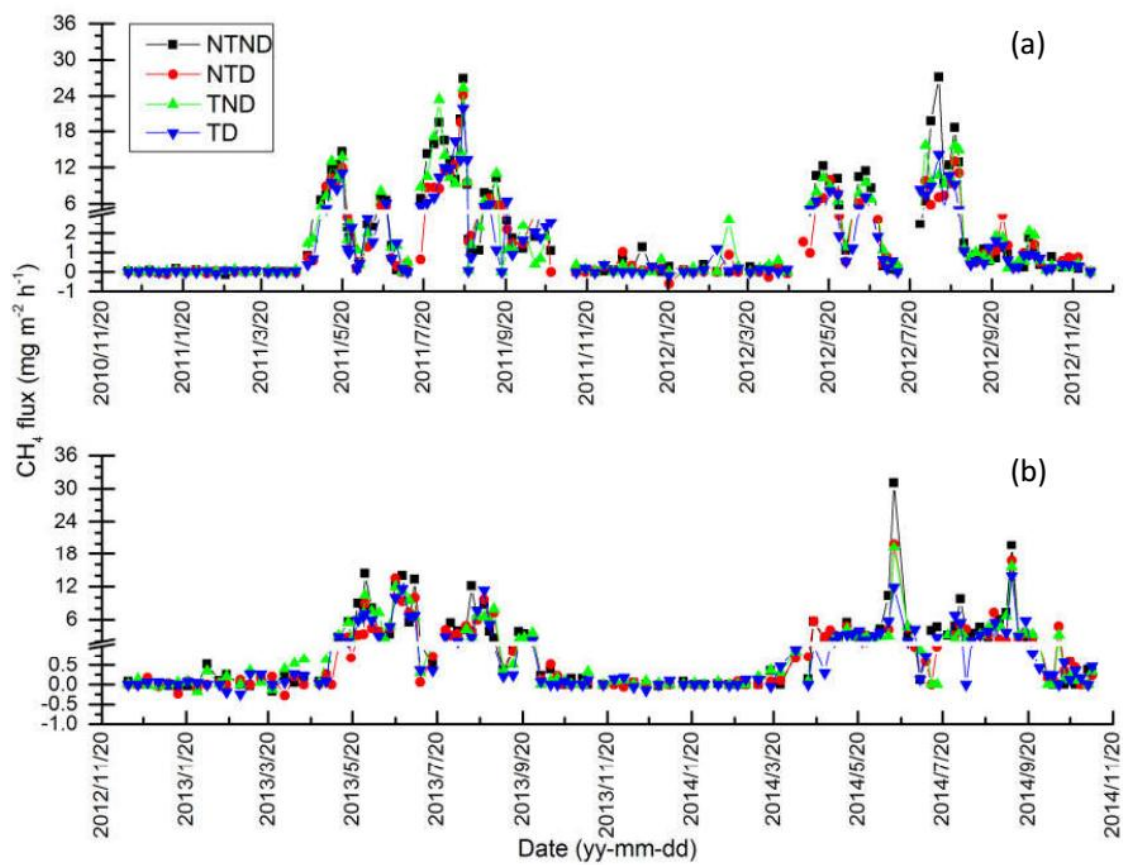

**Figure 1** Seasonal variation of CH<sub>4</sub> emission from 2010 to 2014.

860  
861  
862  
863  
864  
865  
866  
867  
868  
869  
870  
871  
872  
873  
874  
875  
876

877  
878  
879

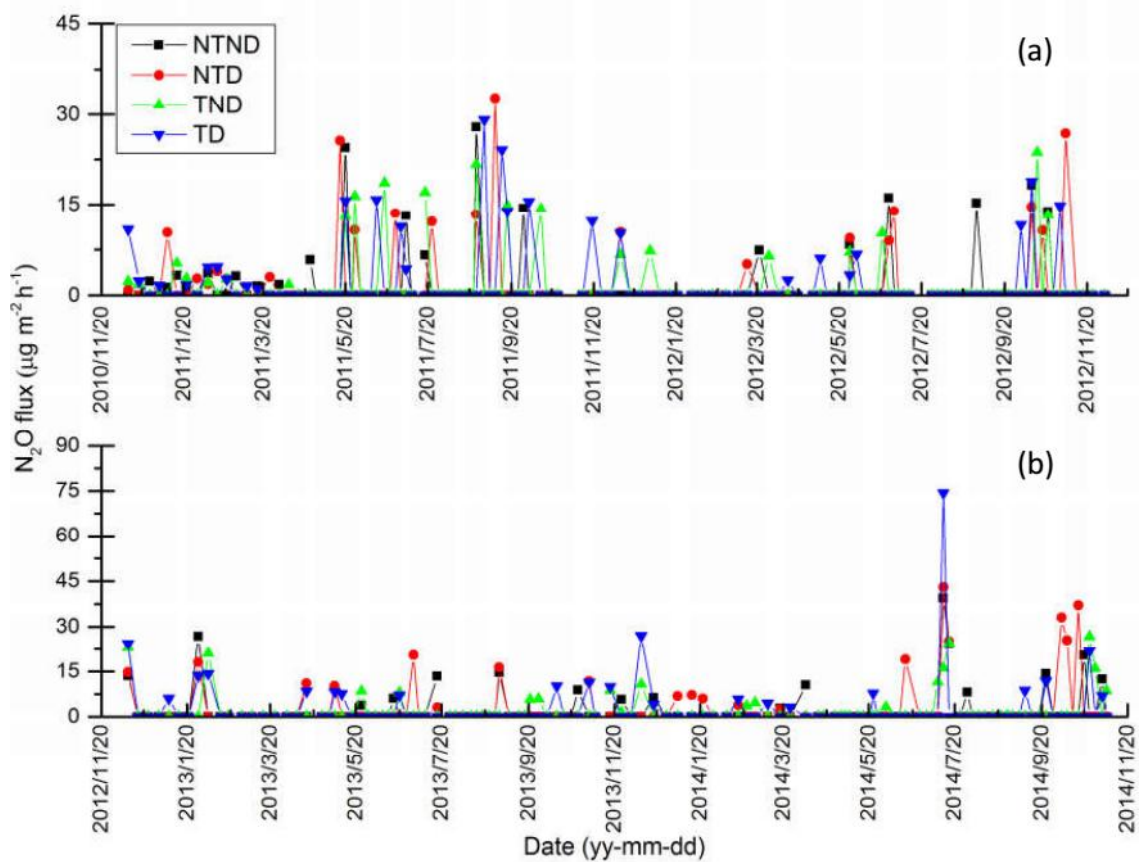

**Figure 2** Seasonal variation of N<sub>2</sub>O emission from 2010 to 2014.

880  
881  
882  
883  
884  
885  
886  
887  
888  
889  
890  
891  
892  
893  
894  
895  
896



897  
 898  
 899

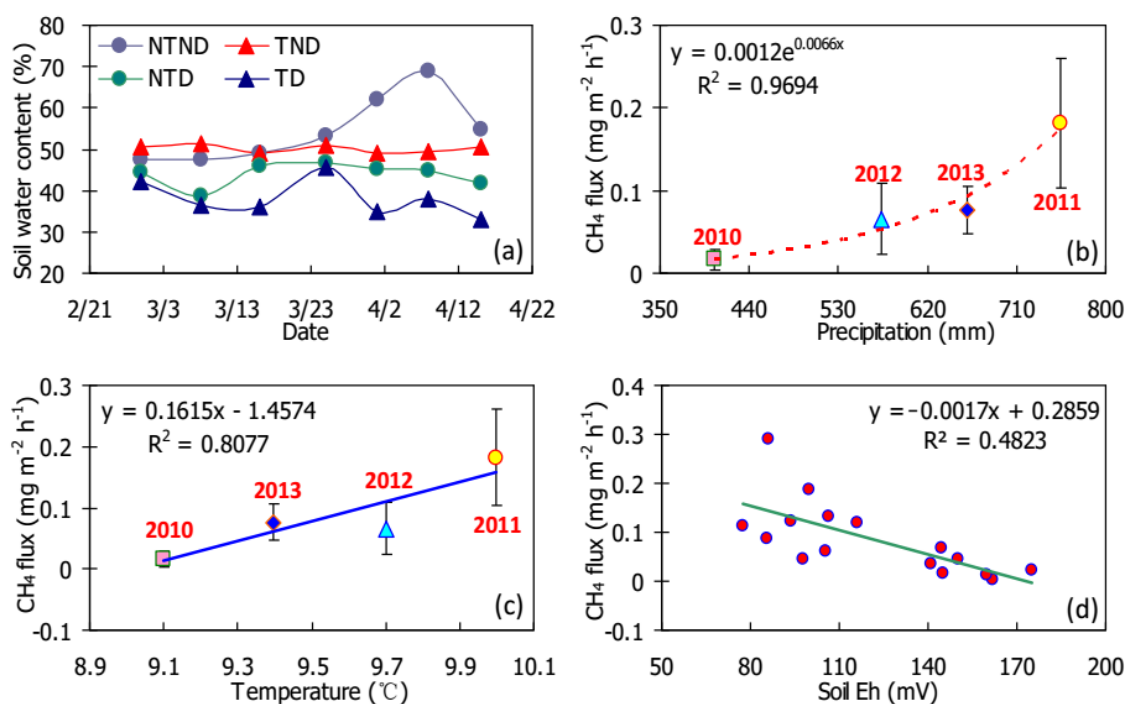

**Figure 3** Soil water content in 2010 winter fallow season (a) and the relationships between mean CH<sub>4</sub> emission and total winter precipitation (b), and mean daily air temperature (c) and soil Eh (d) over the 4 winter fallow seasons (Data from Table 4).

900  
 901  
 902  
 903  
 904  
 905  
 906  
 907  
 908  
 909  
 910  
 911  
 912  
 913  
 914  
 915  
 916  
 917

918  
919  
920

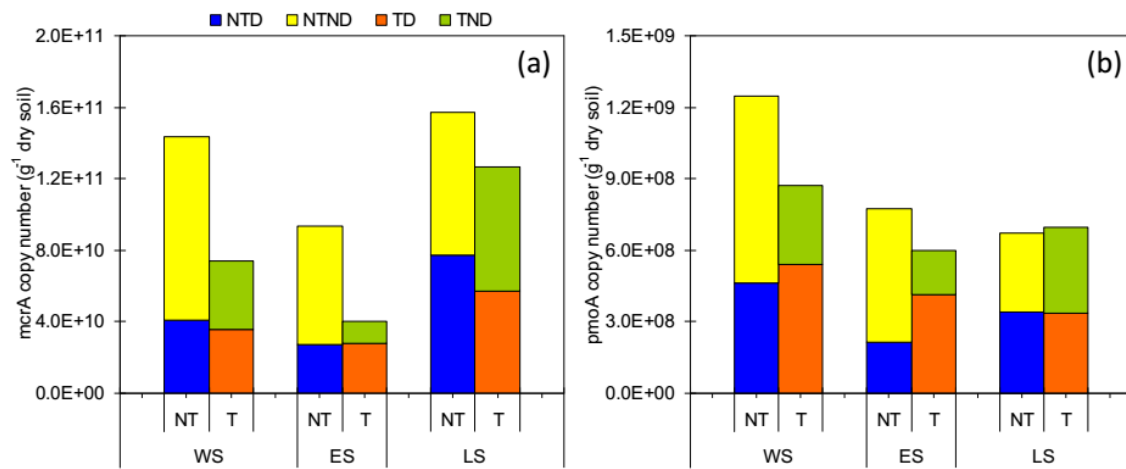

**Figure 4** The abundance of methanogens and methanotrophs populations in paddy soil from 2013 to 2014, WS, ES, and LS means winter fallow season, early-rice season, and late-rice season, respectively.

921
